Running title: desert adaptation *Peromyscus*

Limited evidence for parallel evolution among desert adapted *Peromyscus* deer mice

Authors: Jocelyn P. Colella<sup>1,2,†\*</sup>, Anna Tigano<sup>1,2</sup>, Olga Dudchenko<sup>3,4</sup>, Arina D. Omer<sup>4</sup>, Ruqayya Khan<sup>4,5</sup>, Ivan D. Bochkov<sup>4,5</sup>, Erez L. Aiden<sup>3,4,6,7</sup>, Matthew D. MacManes<sup>1,2</sup>

<sup>1</sup>University of New Hampshire, Molecular, Cellular, and Biomedical Sciences Department, Durham, NH 03824, USA; jcolella.jc@gmail.com (JPC), anna.tigano@unh.edu (AT) matthew.macmanes@unh.edu (MDM)

<sup>2</sup>Hubbard Genome Center, University of New Hampshire, Durham, NH 03824, USA

<sup>3</sup>Department of Computer Science, Department of Computational and Applied Mathematics; Center for Theoretical and Biological Physics, Rice University, Houston, TX 77030, USA; Olga.Dudchenko@bcm.edu (OD), erez@erez.com (ELA)

<sup>4</sup>The Center for Genome Architecture, Department of Molecular and Human Genetics, Baylor College of Medicine, Houston, TX 77030, USA; arinadanaomer@yahoo.com (ADO), Ruqayya.Khan@bcm.edu (RK), ibochkov33@gmail.com (IDB)

<sup>5</sup>Department of Computer Science, Department of Computational and Applied Mathematics, Rice University, Houston, TX 77030, USA;

<sup>6</sup>Shanghai Institute for Advanced Immunochemical Studies, ShanghaiTech University, Shanghai 201210, China

<sup>7</sup>School of Agriculture and Environment, University of Western Australia, Perth, WA 6009, Australia

<sup>†</sup>Biodiversity Institute, University of Kansas, Lawrence, KS 66045, USA

\* Corresponding Author: Jocelyn.Colella@unh.edu

## ABSTRACT

1  
2 Phenotypic plasticity enables an immediate response to changing conditions, but for most  
3 species, evolutionary change through adaptation will be more important for long-term survival.  
4 Warming climate and increasing desertification urges the identification of genes involved in  
5 heat- and dehydration-tolerance to better inform and target biodiversity conservation efforts.  
6 Comparisons among extant desert adapted species can highlight parallel or convergent patterns  
7 of genome evolution through the identification of shared signatures of selection. We generate  
8 chromosome-level genome assembly for the canyon mouse (*Peromyscus crinitus*) and test for  
9 signature of parallel evolution by comparing signatures of selective sweeps across population-  
10 level genomic resequencing data from another desert specialist deer mouse (*P. eremicus*) and  
11 a widely-distributed habitat generalist (*P. maniculatus*), that may locally adapted to arid  
12 conditions. We identify few shared candidate loci involved in desert adaptation and do not find  
13 support for a shared pattern of parallel evolution. Instead, we hypothesize divergent molecular  
14 mechanisms of desert adaptation among deer mice, potentially tied to species-specific historical  
15 demography, which may limit or enhance adaptation. We identify a number of candidate loci  
16 experiencing selective sweeps in the *P. crinitus* genome that are implicated in osmoregulation  
17 (*Trypsin*, *Prostasin*) and metabolic regulation (*Kallikrein*, *eIF2-alpha kinase GCN2*, *APPL1/2*),  
18 which may be important to accommodating hot and dry environmental conditions.

19

20 **Key words:** dehydration, desert, parallel evolution, *Peromyscus*, thermoregulation

21

## INTRODUCTION

22 Increasing global temperatures and altered patterns of precipitation threaten biodiversity  
23 worldwide (Moritz et al. 2008; Cahill et al. 2013; Urban 2015). Phenotypic plasticity enables an  
24 immediate response to changing conditions but adaptation through evolutionary change will be  
25 critical for the long-term survival of most species (Hoffman and Sgrò 2011; Cahill et al. 2013).  
26 Range shifts upward in elevation and latitude have been documented in a number of terrestrial  
27 species and interpreted as a response to warming (Chen et al. 2011; Tingley and Beissinger  
28 2013; Freeman et al. 2018); however, responses vary even among closely-related species or  
29 populations (Hoffman and Willi 2008; Moritz et al. 2008). Geographic range shifts are often  
30 governed by the physiological limits of species, which are in part controlled by genetics and  
31 have been shaped by neutral and selective evolutionary forces across many generations.  
32 Population genomics methods enable genome-wide scans for selection to identify genes and  
33 molecular pathways that may be involved in local adaptation (Bassham et al. 2018; Garcia-  
34 Elfring et al. 2019). For species adapted to similar environments, parallel or convergent  
35 evolution can be inferred if a greater number of genes or phenotypes share signatures of  
36 selection than would be expected under a purely stochastic model of evolution (e.g., drift). The  
37 same gene or suite of genes consistently tied to a specific adaptive phenotype across distantly  
38 related taxa is consistent with a signal of convergent evolution. In contrast, for taxa that share a  
39 recent common ancestor, signatures of selection at the same loci may reflect parallel selection  
40 on either new mutations or shared ancestral variation or similar demographic histories, resulting  
41 in the same phenotypic effect. Evidence of convergent or parallel evolution can highlight  
42 common loci involved in shared adaptive phenotypes (Rundle et al. 2000; McDonald et al.  
43 2009), while a lack of concerted evolution may identify idiosyncratic evolutionary strategies to  
44 achieve the same phenotypic result.

45 As a model taxon (Dewey and Dawson 2001; Bedford and Hoekstra 2015) inhabiting  
46 varied environments throughout North America, deer mice (genus *Peromyscus*) are a frequent

47 and productive subject of adaptation studies (e.g., physiological, Storz 2007; behavioral, Hu and  
48 Hoekstra 2017; genetic, Cheviron et al. 2012; Storz and Cheviron 2016; Tigano et al. 2020).  
49 Physiological similarity of deer mice to lab mice (*Mus musculus*) further broadens the  
50 implications of evolutionary and ecological investigations of *Peromyscus* by linking to biomedical  
51 sciences. The genus *Peromyscus* (N = 67 species; mammaldiversity.org) is hypothesized to be  
52 the product of a rapid ecological radiation across North America (origin ~8 Mya, radiation ~5.71  
53 Mya; Platt et al. 2015), evident in their varied ecological niches and rich species diversity  
54 (Glazier 1980; Riddle et al. 2000; Bradley et al. 2007; Platt et al. 2015; Lindsey 2020).  
55 *Peromyscus* display tremendous thermoregulatory plasticity and can be found in extreme  
56 thermal environments, ranging from cold, high elevations (Pierce and Vogt 1993; Cheviron et al.  
57 2012, 2014; Kaseloo et al. 2014; Garcia-Elfring et al. 2019) to arid, hot deserts (Riddle et al.  
58 2000; MacManes 2017; Tigano et al. 2020). Thermoregulation and dehydration tolerance are  
59 complex physiological traits, suggesting that several potential evolutionary routes could lead to  
60 the same phenotypic outcome. Within this framework, comparisons among divergent  
61 *Peromyscus* species adapted to similar environments may highlight shared adaptive  
62 polymorphisms or disparate evolutionary paths central to achieving the same phenotype  
63 (Cheviron et al. 2012; Ivy and Scott 2017; Hu and Hoekstra 2017; Storz et al. 2019). In cold  
64 environments, endotherms rely on aerobic thermogenesis to maintain constant internal body  
65 temperatures. Changes in both gene expression and the functional properties of proteins in deer  
66 mice (*P. maniculatus*) adapted to high-altitude suggest that changes in multiple hierarchical  
67 molecular pathways may be common in the evolution of complex physiological traits, such as  
68 thermoregulation (Wichman and Lynch 1991; Storz 2007; Cheviron et al. 2012; Storz and  
69 Cheviron 2016; Garcia-Elfring et al. 2019). Nonetheless, research focused on thermoregulatory  
70 adaptations in high-elevation species may be confounded by concurrent selection on other traits  
71 conferring fitness benefits, such as high hemoglobin oxygen-binding affinity (Storz and Kelly  
72 2008; Storz et al. 2010; Natarajan et al. 2015), which is critically important given the low partial

73 pressure of oxygen ( $\text{PaO}_2$ ) associated with high elevation environments. In hot environments,  
74 endotherms are challenged with balancing heat dissipation, energy expenditure, and water  
75 retention (Anderson and Jetz 2005), resulting in a different suite of behavioral, physiological,  
76 and molecular adaptations that enable survival (Schwimmer and Haim 2009; Degen 2012;  
77 Kordonowy et al. 2016), but may be confounded by acute or chronic dehydration.

78 Understanding the biochemical mechanisms that enable survival under extreme environmental  
79 stress can provide important insights into the nature of physiological adaptation.

80         Rapid environmental and ecological differentiation among *Peromyscus* species positions  
81 these small rodents as models for generating hypotheses surrounding species responses to  
82 accelerated warming (Cahill et al. 2013) and the potential for repeated adaptation to similar  
83 environments among closely related species. Numerous *Peromyscus* species are adapted to  
84 life in hot deserts, with each species and population subject to distinct histories of demographic  
85 variation and gene flow. These idiosyncratic histories have a direct impact on evolution, as  
86 effective population sizes ( $N_e$ ) are inextricably linked to the efficacy of selection and  
87 maintenance of genetic diversity in wild populations (Charlesworth 2009). Contemporary or  
88 historical gene flow may further help or hinder adaptive evolution through homogenization or  
89 adaptive introgression, respectively (Coyne and Orr 2004; Morjan and Reiseberg 2004; Jones et  
90 al. 2018; Tigano and Friesen 2016). Native to the American West, the canyon mouse (*P.*  
91 *crinitus*, Fig. 1) is a xerocole, highly specialized to life in hot deserts. In the lab, *P. crinitus* can  
92 survive in the absence of exogenous water, with urine concentration levels similar to that of  
93 desert-adapted kangaroo rats (*Dipodomys merriami*; Abbott 1971; MacMillen 1972; MacMillen  
94 and Christopher 1975; MacMillen 1983), but without equivalently specialized renal anatomy  
95 (Issaian et al. 2012). Canyon mice also exhibit a lower-than-expected body temperature relative  
96 to their size and can enter environmentally-induced torpor in response to drought, food  
97 limitation, or extreme external temperatures (McNab 1968; McNab and Morrison 1963; Morhardt  
98 and Hudson 1966; Johnson and Armstrong 1987), which facilitates survival in highly-variable

99 and extreme desert environments. These phenotypes persist for multiple generations in the lab  
100 indicating they have a genetic basis (McNab and Morrison 1968). Cactus mice (*P. eremicus*) are  
101 frequently sympatric with *P. crinitus* and share the same adaptations described above for *P.*  
102 *crinitus* (Veal and Caire 1979; Kordonowy et al. 2017). Thus, we expect these two species to  
103 exhibit similar patterns of molecular adaptation. These two desert specialists belong to a  
104 monophyletic clade of deer mice, which also includes *P. merriami*, *P. californicus*, *P. eva*, and *P.*  
105 *fraterculus*, and is estimated to have diverged around 5-6 Mya (Platt et al. 2015). Other  
106 members of this clade exhibit similar adaptations to desert environments, including urine  
107 concentration, reduced water requirements, and environmentally-induced torpor (McNab and  
108 Morrison 1963; Veal and Caire 1979) suggesting that desert adaptation may represent the  
109 ancestral state of this clade. In contrast, the habitat generalist *P. maniculatus* (North American  
110 deer mouse) is phylogenetically basal to the two desert specialists examined here and has a  
111 geographically widespread distribution across North America. *Peromyscus maniculatus* inhabits  
112 a wide range of thermal environments, including hot southwestern deserts and cool, high  
113 elevations, but desert specialists are not its closest relatives and the species is not generally  
114 considered a xerophile. Locally adapted desert populations of *P. maniculatus* (subspecies *P. m.*  
115 *sonoriensis*), however, may exhibit patterns of selection similar to that of desert specialists,  
116 either through the parallel selective retention of functional ancestral polymorphisms or  
117 convergent selection on new mutations. Whole-genome assemblies are publicly available for  
118 both *P. eremicus* (PRJEB33593, ERZ119825; Tigano et al. 2020) and *P. maniculatus*  
119 (GCA\_003704035.1), which positions these species as ideal comparatives against *P. crinitus* to  
120 identify genes and regulatory regions associated with desert adaptation, including those unique  
121 to desert specialists *P. eremicus* and *P. crinitus*.

122 Here, we investigate genomic signatures of selection among desert adapted  
123 *Peromyscus*. We contrast signatures of selective sweeps across three related *Peromyscus*  
124 species, two desert specialists (*P. crinitus* and *P. eremicus*) and one habitat generalist collected

125 in an arid environment (*P. maniculatus*). We hypothesize that similar genes or functional groups  
126 will be under selection in related desert specialist species (*P. eremicus* and *P. crinitus*), due to  
127 their shared recent common ancestor and mutual association with hot, arid environments. In  
128 contrast, we hypothesize that *P. maniculatus* will show idiosyncratic evolutionary responses,  
129 with arid adaptation in this clade having evolved independently in response to local conditions. If  
130 similar genes and pathways are under selection in all three species, it would suggest local  
131 adaptation of *P. maniculatus* to desert conditions, and potentially, parallel or convergent  
132 evolution among divergent *Peromyscus* clades. Given the evolutionary distance of *P.*  
133 *maniculatus* to the two desert adapted species, a shared signature of selection across all three  
134 species may also indicate that adaptive responses to desert conditions are predictable and can  
135 occur repeatedly and potentially on short evolutionary timescales. Finally, we place selective  
136 sweep analyses into an evolutionary framework to interpret the varied evolutionary trajectories  
137 available to small mammals to respond to changing environmental conditions and to account for  
138 demographic and gene flow events.

139

140

## MATERIALS AND METHODS

141

### *De novo genome sequencing and assembly*

142

143

144

145

146

147

148

149

150

Wild mice were handled and sampled in accordance with the University of New Hampshire and University of California Berkeley's Institutional Animal Care and Use Committee (130902 and R224-0310, respectively) and California Department of Fish and Wildlife (SC-008135) and the American Society of Mammalogists best practices (Sikes and Animal Care and Use Committee of the American Society of Mammalogists 2016).

For the assembly of the *P. crinitus* genome, DNA was extracted from a liver subsample from an individual collected in 2009 from the Philip L. Boyd Deep Canyon Desert Research Center (DRDC) in Apple Valley, California. To generate a high-quality, chromosome-length genome assembly for this individual we extracted high-molecular-weight genomic DNA using a

151 Qiagen Genomic-tip kit (Qiagen, Inc., Hilden, Germany). A 10X Genomics linked-reads library  
152 was prepared according to the manufacturers protocol and sequenced to a depth of 70X on a  
153 HiSeq 4000 (Novogene, Sacramento, California, USA). 10X Genomics reads were *de novo*  
154 assembled into contigs using *Supernova 2.1.1* (Weisenfeld et al. 2017). To arrange scaffolds  
155 into chromosomes, a Hi-C library for *P. crinitus* was constructed and sequenced from primary  
156 fibroblasts from the T.C. Hsu Cryo-Zoo at the University of Texas MD Anderson Cancer Center.  
157 The Hi-C data were aligned to the supernova assembly using *Juicer* (Durand et al. 2016). Hi-C  
158 genome assembly was performed using the *3D-DNA* pipeline (Dudchenko et al. 2017) and the  
159 output was reviewed using *Juicebox Assembly Tools* (Dudchenko et al. 2018). The Hi-C data  
160 are available on [www.dnazoo.org/assemblies/Peromyscus\\_crinitus](http://www.dnazoo.org/assemblies/Peromyscus_crinitus), where they can be  
161 visualized using *Juicebox.js*, a cloud-based visualization system for Hi-C data (Robinson et al.  
162 2018).

163           Benchmarking Universal Single-Copy Orthologs (*BUSCO* v3, using the Mammalia odb9  
164 database; Simão et al. 2015) and *OrthoFinder2* (Emms and Kelly 2015) were used to assess  
165 genome quality and completeness. Genome sizes were estimated for each species using  
166 *abyss-fac* (Simpson et al. 2009) and the *assemblathon\_stats.pl* script available at:  
167 <https://github.com/ucdavis-bioinformatics/assemblathon2-analysis/>. *RepeatMasker* v.4.0 (Smit  
168 et al. 2015) was used to identify repetitive elements. The genome was annotated using the  
169 software package *MAKER* (3.01.02; Campbell et al. 2014). Control files, protein, and transcript  
170 data used for this process are available at [https://github.com/macmanes-](https://github.com/macmanes-lab/pecr_genome/tree/master/annotation)  
171 [lab/pecr\\_genome/tree/master/annotation](https://github.com/macmanes-lab/pecr_genome/tree/master/annotation). We used *Mashmap* (*-f one-to-one --pi 90 -s 300000*;  
172 Jain et al. 2017, 2018) to assess syntenic conservation between *P. crinitus* and *P. maniculatus*  
173 genomes and alignments were plotted with the script *generateDotPlot.pl*. *Peromyscus crinitus*  
174 chromosomes were renamed and sorted using *seqtk* ([github.com/lh3/seqtk](https://github.com/lh3/seqtk)) following the *P.*  
175 *maniculatus* chromosome naming scheme.



176 For comparative genomics analyses, we generated low-coverage whole-genome  
177 resequencing data for nine *P. crinitus* and five *P. maniculatus* individuals collected from arid  
178 sites in southern California (Fig. 1; Table S1). *Peromyscus crinitus* samples were also collected  
179 from the University of California (UC) DCDRC and *P. maniculatus* were collected further East  
180 from the UC Motte Rimrock (MOT) and Elliot Chaparral Reserves (ELL; Fig. 1). We also used  
181 publicly available low-coverage whole-genome resequencing data from 26 *P. eremicus*  
182 individuals, also collected from DCDRC and MOT, that were prepared and sequenced in parallel  
183 (Tigano et al. 2020). All samples were collected in 2009, with the exception of eight *P. eremicus*  
184 samples that were collected in 2018. Animals were collected live in Sherman traps and a 25 mg  
185 ear-clip was taken from each individual and stored at -80°C in 95% ethanol. Animals were  
186 sampled from arid areas with average monthly temperatures between 9-40°C and mean annual  
187 rainfall of 15-18 cm. The Biotechnology Resource Center at Cornell University (Ithaca, NY,  
188 USA) prepared genomic libraries using the Illumina Nextera Library Preparation kit (e.g., skim-  
189 seq). Libraries were sequenced at Novogene (Sacramento, CA, USA) using 150 bp paired-end  
190 reads from one lane on the Illumina NovaSeq S4 platform. *fastp* v. 1 (Chen et al. 2018) was  
191 used to assess read quality and trim adapters. Sequences from all samples and all species  
192 were mapped to the *P. crinitus* reference genome with *BWA* (Li and Durbin 2010) to enable  
193 comparative analyses, duplicates were removed with *samblaster* v. 0.1.24 (Faust and Hall  
194 2014), and alignments were indexed and sorted using *samtools* v. 1.10 (Li et al. 2009).

195

### 196 *Population Genomics*

197 We used the software package *ANGSD* v. 0.93 (Korneliussen et al. 2014) to call variants from  
198 low-coverage population genomic data from the three species (26 *P. eremicus*, 9 *P. crinitus*, 5  
199 *P. maniculatus*) with high confidence. First, an initial list of high-quality SNPs was identified by  
200 analyzing all samples from the three species together using the settings: *-SNP\_pval 1e-6 -*  
201 *minMapQ 20 -minQ 20 -setMinDepth 20 -minInd 20 -minMaf 0.01*. Then, allele frequencies for

202 each of those high-quality SNPs were calculated independently for each species, with the  
203 following filtering steps: a minimum of half (*-minInd*) *P. crinitus* and *P. eremicus* samples and all  
204 *P. maniculatus* samples had to meet independent quantity (*-minMapQ*) and quality (*-minQ*)  
205 thresholds for each variable site.

206       Differentiation among species was examined using a multidimensional scaling (MDS)  
207 analysis in *ANGSD*. MDS plots were generated in *R* v.3.6.1 (R Core Team 2017) based on the  
208 covariance matrix. Cook's D was used to identify outliers (Cook and Weisberg 1984; Williams  
209 1987). As an additional measure of differentiation, we estimated weighted and unweighted  
210 global  $F_{ST}$  values for each species pair using *realSFS* in *ANGSD*. *NGSadmix* v. 33 (Skotte et al.  
211 2013) was used to fit genomic data into K populations to parse species-level differences and  
212 provide a preliminary screen for genomic admixture under a maximum-likelihood model.  
213 Individuals with < 90% assignment to a particular species were considered putatively admixed.  
214 To examine the impact of coverage on the detection of admixture we also evaluated coverage  
215 distributions among admixed and non-admixed individuals. Nonetheless, expanded sample  
216 sizes with greater sequencing depth will be necessary to detail patterns of population structure  
217 and introgression. We tested K = 1 through K = (N - 1), where N is the number of total  
218 individuals examined. *NGSadmix* was run for all species combined and again for each species  
219 independently.

220       We used Pairwise sequential Markovian Coalescent (*PSMC* v. 0.6.5-r67; Li and Durbin  
221 2011) to examine historical demographic changes through time for each species. *PSMC*  
222 analyses are not suitable for low-coverage genomes, therefore we used the higher-coverage  
223 reads used to generate the high-quality, chromosome-length assemblies for each species (*P.*  
224 *crinitus*, assembly methods detailed above; *P. eremicus*, SAMEA5799953, Tigano et al. 2020;  
225 *P. maniculatus*: GCA\_003704035.1, Harvard University). Quality reads (q > 20; *Skewer*, Jiang  
226 et al. 2014) were mapped to their respective *de novo* assembled reference to identify  
227 heterozygous sites. Reference assemblies were then indexed in *BWA*. *Samblaster* removed

228 PCR duplicates and *picard* (<http://broadinstitute.github.io/picard/>) added a read group to the  
229 resulting bam file and generated a sequence dictionary (*CreateSequenceDictionary*) from the  
230 reference assembly. For each species, *samtools* was used to sort and index alignments, and  
231 variants were called using *mpileup* in *bcftools v1.10.2* (*call*, Li et al. 2009). Consensus  
232 sequences were called in *VCFTools v 0.1.16* (*vcf2fq*, Danecek et al. 2011). *PSMC* distributions  
233 of effective population size ( $N_e$ ) were estimated with 100 bootstrap replicates and results were  
234 visualized with *gnuplot v. 5.2* (Williams and Kelley 2010), using perl scripts available at  
235 [github.com/lh3/psmc](https://github.com/lh3/psmc). Output was scaled by a generation time of 6 months (0.5 yr, Millar 1989;  
236 Pergams and Lacy 2008) and a general mammalian mutation rate of  $2.2 \times 10^{-9}$   
237 substitutions/site/year (Kumar and Subramanian 2002).

238

#### 239 *Tests for selection & convergence*

240 We used *Sweepfinder2* (Nielsen et al. 2005; Huber et al. 2016; DeGiorgio et al. 2016) to detect  
241 recent selective sweeps as it is compatible with low-coverage whole-genome data. This method  
242 performs a composite likelihood ratio (CLR) test to detect deviations from the neutral site  
243 frequency spectrum (SFS) that may indicate recent positive selection. *Sweepfinder2* was run on  
244 both variant and invariant sites (Huber et al. 2016) for each species, excluding sex  
245 chromosomes. Sex-chromosomes were excluded for three reasons: (1) sex chromosome  
246 evolution is both rapid and complex relative to autosomes, (2) we had different sample sizes of  
247 each sex across species, and (3) desert adaptations, the focus of this study, are unlikely to be  
248 sex-specific. We repeated *Sweepfinder2* analyses on *P. eremicus*, initially analyzed by Tigano  
249 et al. (2020), using an improved annotation scheme based on *Peromyscus*-specific data rather  
250 than *Mus musculus*. Allele frequencies were estimated in *ANGSD* independently for each  
251 species and converted to allele counts, and the site frequency spectrum (SFS) was estimated in  
252 *Sweepfinder2* from autosomes only. Identification of sweeps were based on the pre-computed  
253 SFS and the CLR was calculated every 10,000 sites. Per Tigano et al. (2020), a 10 kbp window

254 size was selected as a trade-off between computational time and resolution. CLR values above  
255 the 99.9<sup>th</sup> percentile of the empirical distribution for each species were considered to be  
256 evolving under a model of natural selection, hereafter referred to as significant sweep sites.  
257 Smaller sample sizes produce fewer bins in the SFS and a lower number of rare alleles may  
258 impact both the overall SFS and local estimate surrounding sweep sites; therefore, we explored  
259 the impact of sample sizes on *Sweepfinder2* results by downsampling the number of genomes  
260 analyzed for each species to five individuals (the total number of low-coverage genomes  
261 available for *P. maniculatus*) and compared sweep results between downsampled and all-  
262 sample datasets for the three smallest chromosomes: 21, 22, and 23.

263 For each species, mean Tajima's D was calculated across the entire genome in non-  
264 overlapping windows of 10 kbp and 1 kbp in *ANGSD*. Nucleotide diversity ( $\pi$ ) was also  
265 calculated in 10 kbp and 1 kbp windows and corrected based on the number of sites genotyped  
266 (variant and invariant) per window. Tajima's D and  $\pi$  are expected to be significantly reduced in  
267 regions surrounding selective sweeps (Smith and Haigh 1974; Kim and Stephan 2002),  
268 therefore we also used a Mann-Whitney test ( $p < 0.05$ , after a Bonferroni correction for multiple  
269 tests) to measure significant deviations from the global mean in 1 kbp and 10 kbp flanking  
270 regions surrounding significant sweep sites. We also examined D and  $\pi$  for flanking regions  
271 surrounding 27 candidate genes identified in a previous transcriptomic investigation of *P.*  
272 *eremicus* and potentially involved in dehydration tolerance (MacManes 2017; Table S2).  
273 Candidate loci include aquaporins (N = 12), sodium-calcium exchangers (*SLC8a1*), and *Cyp4*  
274 genes belonging to the Cytochrome P450 gene family (N = 14). We used custom python scripts  
275 to functionally annotate (I) the closest gene to each significant sweep site, (II) the nearest  
276 upstream and downstream gene, regardless of strand (sense/antisense), and (III) the nearest  
277 upstream and downstream gene on each strand. Dataset I follows the general assumption that  
278 proximity between a significant sweep site and a protein-coding gene suggests interaction.  
279 Dataset II represents an extension of that model by encompassing the most proximal gene in

280 each direction. Because *Sweepfinder2* is based on unphased data mapped to a consensus  
281 sequence and our data is unphased, we do not have information indicating on which strand a  
282 significant sweep site occurs. Therefore, dataset III encompasses strand-uncertainty by  
283 including the two nearest genes to a significant sweep site on both strands. It should be noted  
284 that the genes identified in smaller datasets (I, II) are nested within the larger datasets (II, III)  
285 and by definition, the larger datasets include more noise, which may dilute a signature of  
286 parallel evolution, but may better capture the true signal of selection. Hence, it is important to  
287 critically examine numerous hierarchical gene subsets. Without a linkage map, these analyses  
288 remain exploratory and can be better refined with estimates of linkage disequilibrium, linkage  
289 block sizes, and gene density in future investigations. We tested genes from each dataset for  
290 functional and pathway enrichment in Gene Ontology (GO) categories using *Panther v. 15.0* (Mi  
291 et al. 2017) and extracted GO terms for each enriched functional group. We used *Mus musculus*  
292 as a reference and a Bonferroni correction for multiple tests ( $p < 0.05$ ) to correct for false  
293 discoveries. Enriched GO terms were summarized and visualized in *REVIGO* (Reduce and  
294 Visualize Gene Ontology, Supek et al. 2011) implemented at:  
295 <http://revigo.irb.hr/index.jsp?error=expired>. As a test for similar evolutionary responses to desert  
296 environments, overlap in the gene names and enriched GO terms associated with significant  
297 selective sweeps was assessed for each dataset. Overlap was visualized in the R package  
298 *VennDiagram* (Chen and Boutros 2011). To test for convergence, we used a Fisher's Exact  
299 Test ( $p < 0.05$ ) in the *GeneOverlap* package (Shen 2016) in R to assess whether gene or  
300 enriched GO term overlap between species was greater than expected based on the total  
301 number of genes/GO terms in the genome. To determine if signatures of selection were driven  
302 by differences in sequencing depth, we calculated local coverage in 10 kbp windows  
303 surrounding significant sweep sites and averaged local coverage estimates across all sweeps  
304 on a single chromosome, using a modification of:  
305 [https://github.com/AdamStuckert/Ranitomeya\\_imitator\\_genome/blob/master/GenomeAssembly/](https://github.com/AdamStuckert/Ranitomeya_imitator_genome/blob/master/GenomeAssembly/)

306 [DuplicateOrthologWorkbook.md](#). Local coverage surrounding significant sweep sites for each  
307 chromosome were compared to the chromosomal average calculated for each species  
308 (*samtools coverage --min-MQ 20, --region chr*).

309 To compare patterns of gene family expansion and contraction potentially involved in  
310 adaptation within the genus *Peromyscus*, we analyzed 14 additional genomes, including ten  
311 *Peromyscus* species and four near outgroup rodent species: *Microtus ochrogaster*, *Neotoma*  
312 *lepida*, *Sigmodon hispidus*, and *Mus musculus* (Table S3). To prevent bias driven by variable  
313 assembly qualities, samples with < 70% complete mammalian BUSCOs were excluded from  
314 downstream analyses, resulting in the final analysis of ten species (Table S3). Groups of  
315 orthologous sequences (orthogroups) were identified in *Orthofinder2*. Invariant orthogroups and  
316 groups that varied by more than 25 genes across taxa (custom python script: *ortho2cafe.py*)  
317 were excluded. Our rooted species tree, estimated in *Orthofinder2*, was used to calculate a  
318 single birth-death parameter ( $\lambda$ ) and estimate changes in gene family size using *CAFE*  
319 *v.4.2.1* (Han et al. 2013). Results were summarized using the python script  
320 *cafetutorial\_report\_analysis.py* available from the Hahn Lab at:  
321 [hahnlab.github.io/CAFÉ/manual.html](http://hahnlab.github.io/CAFÉ/manual.html).

322

323

## RESULTS

324

### *Chromosome-length genome assembly for P. crinitus*

325

326

327

328

329

330

331

Linked reads combined with Hi-C scaffolding produced a high-quality, chromosome-length genome assembly for *P. crinitus*. Our assembly has a contig N50 of 137,026 bp and scaffold N50 of 97,468,232 bp, with 24 chromosome-length scaffolds. The anchored sequences in the three *Peromyscus* genome assemblies were as follows: *P. crinitus* genome ~2.27 Gb, *P. eremicus* ~2.5 Gb, and *P. maniculatus* ~2.39 Gb (Table 1). Our assembly has high contiguity and completeness and low redundancy, as demonstrated by the presence of 89.3% complete BUSCOs, 0.9% of duplicates, and 9.0% missing, excluding unplaced scaffolds. As anticipated

332 based on karyotypic analyses (Smalec et al. 2019), we found no significant variation in  
333 chromosome number or major interchromosomal rearrangements between *P. crinitus* and *P.*  
334 *maniculatus* (Fig. S4). We annotated 17,265 total protein coding genes in the *P. crinitus*  
335 genome. Similar to other *Peromyscus* species, LINE1 (long interspersed nuclear elements) and  
336 LTR (long terminal repeats) elements comprised 22.7% of the repeats in the *P. crinitus* genome,  
337 with SINEs (short interspersed nuclear elements) representing an additional 9.6% (Table S5).  
338 Although similar to other *Peromyscus* species, *P. crinitus* has the greatest total repeat content  
339 (> 37%; see Tigano et al. 2020 Supplementary Table 2).

340

#### 341 *Population Genomics*

342 MDS analysis parsed the three species into three well-separated clusters and identified no  
343 outliers or evidence of admixture (Fig. S6). *NGSadmix* identified all three species as a single  
344 group ( $K = 1$ ) with the highest likelihood, but a three-population model neatly parsed the three  
345 species as expected (Fig. S7, Table S8). *NGSadmix* analysis, which is more sensitive to low  
346 sample sizes than MDS analyses, showed putative admixture in *P. crinitus* with at least three  
347 individuals displaying 11-27% ancestry from *P. eremicus* and additional material from *P.*  
348 *maniculatus* (4-16%). Variable samples sizes may impact assignment certainty and expanded  
349 sequencing of additional *Peromyscus* species and populations will be required to identify  
350 potential sources of introgressed material. Four *P. eremicus* individuals had < 90% assignment  
351 probability to the *P. eremicus* species cluster, with a maximum of 15% assignment to a different  
352 species cluster. Identification of admixture in both species was not biased by differences in  
353 coverage, as low (2X), medium (8X), and high coverage (17X) samples were found to be  
354 admixed at a < 90% assignment threshold (Fig. S9). No *P. maniculatus* individuals were  
355 identified as admixed.

356 *PSMC* estimates of historical demography (> 10 kya, Nadachowska-Brzyska et al. 2016)  
357 show greater variance and a higher overall  $N_e$  for *P. crinitus* relative to *P. eremicus* (Fig. 2).



358 Demographic estimates for *P. maniculatus* are included as an additional comparison but should  
359 be interpreted with caution as they are based on sequence data from a captive-bred individual  
360 and may not accurately reflect the demography of wild populations.

361

### 362 *Selection & convergence*

363 *Sweepfinder2* results were generally consistent across downsampled (N = 5) and all-sample  
364 datasets (9 *P. crinitus*, 26 *P. eremicus*). For example, there were no significant sweep sites  
365 identified on chromosome 21 for *P. crinitus* using either dataset, and although more sweeps  
366 were significant on chromosome 23 for the downsampled dataset (16 vs. 8), 15 of the 16  
367 sweeps were proximal to a single protein coding gene (*S15A3*) that was also identified as  
368 experiencing a significant sweep when using all available data. All genes proximal to significant  
369 sweep sites in the downsampled *P. crinitus* dataset were also identified when all samples were  
370 analyzed. Six additional genes were identified as experiencing selective sweeps when the  
371 complete dataset was evaluated. Results for *P. eremicus* were slightly less consistent: identical  
372 numbers of sweep sites were detected on chromosomes 22 and 23 with additional significant  
373 sweep sites identified on chromosome 21 when all samples were examined. The majority of  
374 sweep sites on chromosome 21 in *P. eremicus* were proximal to *G3P*, which represented a  
375 significant sweep in both downsampled and all-sample datasets; however, there were eight  
376 additional protein coding genes proximal to significant sweep sites that were detected using the  
377 downsampled dataset, but not detected when all samples were included in the analysis (e.g.,  
378 *Peripherin-2*, *BICRAL*, *Mrps18b*). We hypothesize that population structure may increase  
379 inconsistency in these results, as the 26 *P. eremicus* samples represent two populations (Motte  
380 and DCDRC) and three distinct collection events (Motte 2018, DCDRC 2009 and DCDRC 2018;  
381 Table S1), whose representation in the reduced dataset may vary due to different sample sizes  
382 and random selection of downsampled individuals. While the study design does not allow us to  
383 distinguish between type 1 and type 2 statistical errors, we hypothesize that inconsistencies are



384 related to differences in statistical power, with greater power in the full datasets relative to the  
385 subsampled datasets.

386         Within *P. crinitus* we identified a total of 209 significant sweep sites (Table S10), with  
387 104 sites localized on chromosomes 9 and 16 experiencing major selective sweeps (Fig. 3). We  
388 found 239 total significant sweep sites for *P. eremicus* (Table S11, Fig. S12). Despite the large  
389 size of chromosome 1 and strong signature of selective sweeps in *P. eremicus*, we found no  
390 significant sweep sites on this chromosome for *P. crinitus*. Finally, we identified a total of 213  
391 significant sweep sites for *P. maniculatus* (Table S13), with 103 sites located on chromosome 4.  
392 Despite general chromosomal synteny among *Peromyscus* species (Fig. S4, Tigano et al.  
393 2020), the chromosomal distribution of sweep sites differed among species. For example, *P.*  
394 *eremicus* had at least one significant sweep detected on every chromosome, while sweeps  
395 were only detected on 8 or 13 chromosomes in *P. maniculatus* and *P. crinitus*, respectively. We  
396 found a number of sweep sites were concentrated on chromosome 9 for both desert specialist  
397 species, with additional significant sweep sites for *P. crinitus* localized on chromosome 16 (Fig.  
398 3, S12; Table S10-11). Sweeps in *P. eremicus* were widespread across the genome, with a  
399 large peak (56 significant sweep sites) on chromosome 1 (Table 11; Fig. S12). *Peromyscus*  
400 *maniculatus* sweeps fell primarily on chromosomes 4 and 20 (Table S13). The chromosomal  
401 distribution of significant sweep sites does not appear to be driven by differences in coverage  
402 (Table S14). Average sequencing depth for 10 kbp windows surrounding each significant sweep  
403 site did not differ significantly from the global average sequencing depth for *P. crinitus* ( $p = 0.25$ )  
404 or *P. maniculatus* ( $p = 0.28$ ). Local (10 kbp window) coverage surrounding significant sweeps  
405 for *P. eremicus* were less consistent (Table S10, S11, S13; Supplementary Results). Fourteen  
406 of 232 significant sweep sites (6%) in *P. eremicus* exhibited extreme local sequencing depths of  
407 0 or >1,000, leading to a significant difference between overall mean sequencing depth and  
408 sequencing depth surrounding sweep sites ( $p = 0.03$ ), with sweep windows exhibiting higher

409 sequencing depths on average (73 vs. 25). If the 14 anomalous values are excluded,  
410 sequencing coverage does not differ ( $p = 0.37$ ) for *P. eremicus*.

411         The effect of a selective sweep extends beyond the specific site identified as the target  
412 of positive selection; hence, putative outliers (CLR > 99.9%) are indicative of a sweep in the 10  
413 kbp window but the specific nucleotides under selection cannot be identified. As coding genes  
414 represent only a small proportion of the genome, if a sweep site does not fall in one of these  
415 regions we assume that the target of selection may be a regulatory element affecting gene  
416 expression of proximal coding genes. Under this assumption, we hierarchically examined  
417 protein coding genes most proximal to each sweep site and chose not to set a distance  
418 threshold, as regulatory elements are known to affect genes up to hundreds of kb away (e.g.,  
419 Wallbank et al. 2016). On average the distance from a sweep site to the nearest coding gene  
420 was 45 kbp in *P. crinitus* (range: 31 - 439,122 bp, median = 5 kbp) and much greater for both *P.*  
421 *maniculatus* (average: 152 kbp; range: 190 - 513,562 bp, median = 111 kbp) and *P. eremicus*  
422 (average: 117 kbp; range: 38 - 1,423,027 bp; median: 35 kbp), despite high assembly qualities  
423 for all species and identical methods of gene annotation. For both *P. eremicus* and *P.*  
424 *maniculatus*, only two significant sweep sites were localized within protein-coding genes (*P.*  
425 *eremicus*: Meiosis-specific with OB domain-containing protein, Harmonin; *P. maniculatus*:  
426 Dehydrogenase/reductase SDR family member 7B and Zinc finger protein 217; Table 2). In  
427 contrast, for *P. crinitus* 12 significant sweep sites fell within 19 distinct candidate loci, many of  
428 which code for multiple alternatively spliced transcripts (Table 2). Among the significant sweep  
429 sites localized within *P. crinitus* coding sequences, we identified 19 enriched GO terms (3  
430 Biological Process [BP], 9 Molecular Function [MF], 7 Cellular Component [CC]), with  
431 functionality ranging from 'proteolysis' to 'hydrolase' activity (Fig. 4; Table S15). Functional  
432 examination of candidate loci identified solute regulation as a key function, with genes  
433 pertaining to calcium (*Trypsin-2* [*PRSS2*]) and zinc (*Kallikrein-4* [*KLK4*]) binding and sodium  
434 regulation (*Prostasin* [*PRSS8*]) indicated as under selection.

435 Here we report the results for dataset II, as this dataset (i) ensures the inclusion of the  
436 most proximal gene under selection, by including the most proximal gene on each strand, and  
437 (ii) reduces noise associated with dataset III, which includes four genes proximal to each sweep  
438 site. Results for datasets I and III are addressed in more detail in the Supplementary  
439 Information. Examination of dataset II in *P. crinitus* identified 121 unique genes and 26 enriched  
440 GO terms (8 Biological Processes [BP], 10 Molecular Functions [MF], 8 Cellular Component  
441 [CC]), with functionality pertaining to metabolism (e.g., 'protein metabolic process',  
442 'organonitrogen compound metabolic process', 'peptide metabolic process') and ribosomes (Fig.  
443 4; Tables S10, S15). For *P. eremicus*, we identified 202 unique genes and 14 enriched GO  
444 terms (0 BP, 1 MF, 13 CC) associated with selective sweeps, with functionality centered around  
445 ribosomes (Table S11, S16). For *P. maniculatus*, we identified 215 unique genes and eight  
446 enriched GO terms (0 BP, 1 MF, 7 CC) associated with selective sweeps (Table S13, S17). Two  
447 genes and seven enriched GO terms that were proximal to sweep sites were shared between  
448 the two desert specialists, but the number of shared genes was not significantly different from  
449 what is expected by chance alone. Functional enrichment of *P. eremicus* and *P. maniculatus*  
450 across all datasets was limited to ribosomes (e.g., 'structural constituent of ribosome', 'cytosolic  
451 ribosome', 'ribosomal subunit'; Fig. 4; Table 3, S15-17). In contrast, functionality of enriched GO  
452 terms for *P. crinitus* centered on metabolic processes, including protein breakdown, hydrolysis,  
453 and cellular functionality (e.g., 'organelle', 'intracellular', 'cytoplasm'; Fig. 4; Table S15), in  
454 addition to ribosomes.

455 *Peromyscus eremicus* and *P. maniculatus* shared significant overlap ( $p < 0.05$ ) in  
456 enriched GO terms across all hierarchical data subsets (I, II, III; Fig. 5). Significant overlap of  
457 enriched GO terms was also detected between *P. crinitus* and both other *Peromyscus* species  
458 for datasets II and III only, with no overlap detected for dataset I (Fig. 5). Significant overlap  
459 between desert specialists *P. eremicus* and *P. crinitus* was only detected in dataset III. Overall,

460 GO terms and genes associated with ribosomal functionality were frequently shared among all  
461 species examined, but a unique pattern of selection was not shared among desert specialists.

462 Species tree estimates (Fig. S18) were consistent with previous phylogenetic  
463 investigations (Bradley et al. 2007). *Peromyscus crinitus* and *P. eremicus* are sister in our  
464 species tree, but note that a number of intermediate taxa remain unsampled (e.g., *P. merriami*,  
465 *P. californicus*). Among the species examined here, the two desert specialists are part of a  
466 larger clade of desert adapted *Peromyscus* to the exclusion of *P. maniculatus*. The *maniculatus*  
467 clade is comprised of *P. leucopus*, *P. polionotus*, and *P. maniculatus*, and the *nasutus-attwateri*  
468 clade is most basal within *Peromyscus* (Fig. S18), consistent with Platt et al. (2015). For the  
469 *Peromyscus* genus, we found 19,925 gene families that had experienced contractions, 502  
470 expansions, and 12 families that were evolving rapidly. However, we found no gene families  
471 experiencing significant expansions, contractions, or rapid evolution below the genus level.

472 Average Tajima's D (1 kbp windows) was negative for all species and ranged from -0.69  
473 to -1.61. *Peromyscus crinitus* had the lowest Tajima's D value and *P. maniculatus* the highest  
474 (Fig. S19-20). Global pairwise  $F_{ST}$  between species ranged from 0.20-0.27 (unweighted: 0.12-  
475 0.17). Mean global  $\pi$  (1 kbp windows) was 0.005 ( $\pm 0.005$ ) for *P. crinitus*, 0.007 ( $\pm 0.007$ ) for *P.*  
476 *eremicus*, and 0.012 ( $\pm 0.010$ ) for *P. maniculatus* (Fig. S21). Both Tajima's D and  $\pi$  for 1 and 10  
477 kbp flanking regions surrounding significant selective sweep sites were significantly higher than  
478 the global average for each species (Table S20). Only in *P. maniculatus* did we detect a  
479 significant reduction in  $\pi$  surrounding significant sweep sites. Tajima's D for flanking regions  
480 surrounding the *a priori* candidate loci identified by MacManes (2017) were also significantly  
481 more positive in all three species (Table S20).

482

483

## DISCUSSION

484 Continued and accelerating environmental change increases the exigency of accurately  
485 predicting species responses to anthropogenic climate change. Adaptive evolutionary

486 responses vary among species and populations, even when subjected to similar environmental  
487 selective pressures (Bi et al. 2015; Garcia-Elfring et al. 2019). Evidence of parallel *de novo*  
488 molecular changes or selective retention of shared ancestral variation can highlight genes or  
489 genomics regions, including but not limited to functional variants, haplotypes, or structural  
490 features of the genome, that may be key to adaptation. Alternatively, the same adaptive  
491 phenotype can evolve through alternative evolutionary strategies. Thus, it is possible, even  
492 among related species, that adaptation to similar environmental conditions will not exhibit similar  
493 patterns of molecular evolution despite similar adaptive phenotypes. We analyzed genome-wide  
494 patterns of selective sweeps among three species of deer mice within the North American  
495 genus *Peromyscus* to identify candidate loci involved in heat- and dehydration-tolerance. We  
496 hypothesized that the desert specialists, *P. crinitus* and *P. eremicus*, would share genes or  
497 pathways associated with selective sweeps that were not shared with phylogenetically ancestral  
498 *P. maniculatus*. These patterns would be indicative of parallel selection (and therefore, parallel  
499 evolution) on either *de novo* mutations or ancestral variation. Given the suite of desert  
500 adaptations shared by these species, shared signatures of selection may relate to survival in  
501 high-temperature, low-water environments. Additionally, we hypothesized that shared patterns  
502 of selective sweeps and enriched functional groups across all three species, if present, would  
503 highlight candidate loci underpinning local adaptation of *P. maniculatus* to arid conditions and  
504 potentially identify common loci involved in the repeated evolution of desert adaptation.  
505 Although the species examined here are monophyletic, the two desert specialists share a more  
506 recent ancestor (Fig. S18) and there are number of unsampled taxa that phylogenetically  
507 separate the desert specialists from *P. maniculatus* (e.g., *P. merriami*, *P. californicus*). For this  
508 reason, we cannot distinguish between parallel and convergent evolution, and without evidence  
509 of ancestral divergence followed by reconvergence, we will discuss shared signatures of  
510 selection as parallel evolution hereafter.

511 Overall, we did not find support for parallel evolution among desert specialist species,  
512 but we identified a number of candidate loci that may be important to desert adaptation in *P.*  
513 *crinitus*. Instead of a shared mechanism of heat- and dehydration tolerance, we hypothesize  
514 that the two desert specialists examined here may have adapted to similar environments  
515 through divergent molecular mechanisms, with *P. crinitus* potentially responding through  
516 genomic changes to protein coding genes and *P. eremicus* through transcriptional regulation of  
517 gene expression. This hypothesis is based on the lack of overlap in selective sweeps between  
518 desert specialists, the proximity of sweeps to protein coding genes in *P. crinitus* relative to *P.*  
519 *eremicus*, and previous gene expression results for *P. eremicus* (Kordonowy and MacManes  
520 2017; MacManes 2017). Molecular flexibility of thermoregulatory responses may have catalyzed  
521 the radiation of *Peromyscus* in North America by enabling rapid exploitation of novel thermal  
522 environments. Finally, the application of an evolutionary lens to the interpretation of genomic  
523 patterns of selection, particularly one that integrates historical demography and gene flow, can  
524 help parse varied evolutionary mechanisms (parallel vs. convergent, genomic vs.  
525 transcriptomic) of molecular adaptation.

526

#### 527 *Limited evidence of parallel evolution*

528 Identification of similar genes or functional groups under selection in different species adapted  
529 to similar environments can provide evidence in support of parallel evolution. In contrast, we  
530 found limited evidence of parallel evolution among desert-adapted *Peromyscus*. Few to no  
531 enriched GO terms overlapped between desert specialists (Fig. 5). Only GO terms relating to  
532 ribosomes (e.g., ‘ribosome’, ‘ribosomal subunit’, ‘cystolic ribosome’, etc.) overlapped between  
533 all three *Peromyscus* species examined, with the most significant overlap in GO terms occurring  
534 between *P. eremicus* and *P. maniculatus*. Although *P. maniculatus* are not generally xerocoles,  
535 the individuals sequenced here were collected in arid regions of southern California (subspecies  
536 *P. m. sonoriensis*). Therefore, the shared signature of selection on ribosomes across all

537 examined *Peromyscus*, whether it reflects parallel evolution or the selective retention of shared  
538 ancestral polymorphisms, may be associated with adaptation to hot and dry conditions or more  
539 broadly relate to thermoregulatory plasticity among *Peromyscus* rodents. Few genes proximal to  
540 selective sweeps were shared among all species, with only one instance of significant overlap:  
541 ten genes were shared between the two desert specialists under dataset III (Fig. 5). Although  
542 dataset III may be confounded by excess noise through the inclusion of additional protein  
543 coding genes, this signature is potentially consistent with a parallel evolution. Again, many of  
544 the genes shared between *P. crinitus* and *P. eremicus* are directly related to ribosomal  
545 functionality (e.g., *RL36*, *RS26*, *RL15*) and also shared with *P. maniculatus*. Determining  
546 whether these sweeps are the result of shared new mutations or ancestral variation and  
547 whether selection on ribosomal functionality is unique to desert-adapted taxa or more broadly  
548 relevant to the genus will require additional tests for selection and expanded taxonomic  
549 sampling across the genus *Peromyscus*.

550 Cellular damage accumulates quickly in desert environments as a consequence of  
551 increased thermal- and osmotic-stress (Lamitina et al. 2006; Burg et al. 2007). In response,  
552 expression changes modulate osmoregulation by removing and replacing damaged proteins to  
553 prevent cell death (Lamitina et al. 2006); hence, ribosomes, which play a critical role in protein  
554 synthesis and degradation, are central to thermoregulatory responses (Porcelli et al. 2015).  
555 Although we did not find significantly expanded or contracted gene families within the genus  
556 *Peromyscus*, previous investigations of the entire Myodonta clade within Rodentia identified  
557 multiple expanded or contracted gene families associated with ribosomes in *P. eremicus*  
558 (Tigano et al. 2020). Here, ribosomes appear to be a potential target of parallel evolution in  
559 desert-adapted *Peromyscus*, yet this genomic signature is not unique to this genus, nor to  
560 desert-adapted species. First, the relative abundance of ribosome-associated genes throughout  
561 the genome (>1000 GO annotations pertaining to ribosomes, Bult et al. 2019) may intrinsically  
562 increase the representation of this functional group, especially at coarse resolution (10 kbp



563 windows). Second, selection on ribosomal functionality may be commonly experienced across  
564 many species adapted to distinct thermal environments (metazoans; Porcelli et al. 2015).  
565 Ribosomes are evolutionarily linked to the mitochondrial genomes of animals (Barreto and  
566 Burton 2012; Bar-Yaacov et al. 2012) and accelerated mitochondrial evolution in animals has  
567 led to compensatory, rapid evolution of ribosomal proteins (Osada and Akashi 2012; Barreto  
568 and Burton 2013; Bar-Yaacov et al. 2012). Rapid mitochondrial diversification within  
569 *Peromyscus* (Riddle et al. 2000; Bradley et al. 2007; Platt et al. 2015), coincident with the  
570 ecological radiation of this genus (Lindsey 2020), suggests that equivalent, recent selection on  
571 ribosomal proteins may be a key evolutionary innovation that enabled Peromyscine rodents to  
572 successfully and quickly adapt to varied thermal environments. Alternatively, broad selection on  
573 ribosomes across all species may also contribute to other, varied aspects of these species  
574 biology. Comparisons among additional *Peromyscus* species will be necessary to test these  
575 hypotheses in detail.

576         Evaporative cooling through sweating, panting, or salivating increases water loss and  
577 challenges osmoregulatory homeostasis in a hot and dry climate (McKinley et al. 2018).  
578 Thermal stress exacerbates dehydration by increasing evaporative water loss and if untreated,  
579 can lead to cognitive dysfunction, motor impairment, and eventually death. In consequence,  
580 osmoregulatory mechanisms are often under selection in extreme thermal environments  
581 (MacManes and Eisen 2014; Marra et al. 2014). Consistent with the importance of  
582 osmoregulation in desert species, four of the ten protein-coding genes that experienced a  
583 significant selective sweep and were shared between desert specialist species (dataset III) are  
584 involved in ion balance (Table 3). Proteins Trypsin-2 (*TRY2*) and Trimeric intracellular cation  
585 channel type-B (*TM38B*) are associated with sweeps in both desert specialists and are involved  
586 in calcium ion ( $\text{Ca}^{2+}$ ) binding and release, respectively. DNA-directed RNA polymerase III  
587 (*RPC1*) has also experienced a significant sweep in both desert specialists and influences  
588 magnesium ( $\text{Mg}^{2+}$ ) binding. Calcium and magnesium cations are among those essential for



589 osmoregulation (also, Na<sup>+</sup>, K<sup>+</sup>, Cl<sup>-</sup>, HCO<sub>3</sub><sup>-</sup>; Stockham and Scott 2008) and parallel selection on  
590 these genes is consistent with the hypothesis that solute-carrier proteins are essential to  
591 maintaining homeostasis in desert-specialized rodents (Marra et al. 2014; Kordonowy and  
592 MacManes 2017). Additional genes involved in osmoregulation were identified as experiencing  
593 selective sweeps only in *P. crinitus* (Table 2; Table S10). Prostatin (*PRSS8*), only found to be  
594 under selection in *P. crinitus*, is critically responsible for increasing the activity of epithelial  
595 sodium (Na<sup>+</sup>) channels, which mediate sodium reabsorption through the kidneys (Narikiyo et al.  
596 2002). Two more genes associated with Ca<sup>2+</sup> regulation (*PRSS2* and *TRYP*) and other genes  
597 regulating zinc (*KLK4*) and iron (*NCOA4*) were also identified as targets of selective sweeps  
598 exclusively in *P. crinitus*.

599         Genomic scans for selective sweeps based on the SFS are only one way to detect  
600 signatures of parallel evolution and these methods can be sensitive to missing data, including  
601 low-coverage and small sample sizes; thus, the putative roles of these candidate genes in  
602 desert adaptation remains to be explored using additional methods with increased sequencing  
603 depth (see Booker et al. 2017, Weigand and Leese 2018) and other experimental approaches  
604 (e.g., MacManes 2017).

605

606                     *Metabolic tuning: proteins-for-water or lipids-for-torpor?*

607 Hot deserts experience dramatic fluctuations in both food and water availability that challenge  
608 species survival (Noy-Meir 1973; Silanikove 1994). Mammals accommodate high temperatures  
609 by increasing body temperatures, to a point, and cold temperatures by aerobic thermogenesis  
610 or metabolic suppression via the initiation of torpor or hibernation (Levesque et al. 2016). When  
611 resources are scarce, metabolism relies exclusively on endogenous nutrients; carbohydrates  
612 (e.g., sugars, glucose) are consumed immediately, then lipids, and eventually, proteins. Protein  
613 oxidation has a low-energy return relative to lipid catabolism (Bar and Volkoff 2012), but yields  
614 five times more metabolic water (Jenni and Jenni-Eiermann 1998; Gerson and Guglielmo

615 2011a, b; McCue et al. 2017). Therefore, in a low-water environment an early shift to protein  
616 catabolism during periods of resource limitation may represent an important water source for  
617 desert species (e.g., protein-for-water hypothesis; Mosin 1984; Jenni and Jenni-Eiermann,  
618 1998; Gerson and Guglielmo, 2011a, b). Consistent with this hypothesis, we identified  
619 numerous candidate genes that experienced selective sweeps in *P. crinitus* and that are  
620 involved in the detection of metabolic-stress and shifts in metabolic fuel consumption. For  
621 example, the gene eIF-2-alpha kinase GCN2 (*E2AK4*), which is responsible for sensing  
622 metabolic stress in mammals and required for adaptation to amino acid starvation, experienced  
623 the strongest selective sweep on chromosome 4 in *P. crinitus* (Fig. 3; Harding et al. 2003; Baker  
624 et al. 2012; Taniuchi et al. 2016). Numerous candidate genes involved in oxidation  
625 (Oxidoreductase NAD-binding domain-containing protein 1 [*Oxnad1*]), fat catabolism (Kallikrein-  
626 6 [*KLK6*]), protein processing (Kallikrein-13 [*KLK13*]), and proteolysis (Kallikrein [*KLK4*, *KLK13*],  
627 Trypsin [*PRSS2*, *TRYP*, *TRY2*], Chymotrypsin-like elastase family member 2A [*CELA2A*]) were  
628 associated with significantly enriched GO terms in *P. crinitus*. Proteolysis was the most enriched  
629 functional group in *P. crinitus* (Fig. 4; Table S15), potentially supporting the protein-for-water  
630 hypothesis.

631 In contrast to the protein-for-water hypothesis, efficient lipid acquisition and storage may  
632 be critical to enabling heat- and drought- induced torpor (Buck et al. 2002; Melvin and Andrews  
633 2009), which allows long duration, low energy survival in desert adapted species, including  
634 *Peromyscus*. Significant weight loss in experimentally-dehydrated *P. eremicus* and enhanced  
635 thermogenic performance of high-altitude-adapted deer mice have been associated with  
636 enhanced lipid metabolism (Cheviron et al. 2012; Kordonowy et al. 2016). At high altitudes,  
637 increased lipid oxidation enables aerobic thermogenesis, but in hot deserts lipids may represent  
638 a valuable energy source in a food-scarce environment (e.g., lipids-for-torpor hypothesis). Two  
639 additional candidate genes, DCC-interacting protein 13-alpha and -beta (*APPL1*, *APPL2*),  
640 experienced significant selective sweeps in *P. crinitus* and are important in glucose regulation,

641 insulin response, and fatty acid oxidation, potentially supporting the lipids-for-torpor hypothesis.  
642 Laboratory manipulations of *APPL1* demonstrate protection against high-fat diet-induced  
643 cardiomyopathy in rodents (Park et al. 2013) and *APPL2* is responsible for dietary regulation,  
644 cold-induced thermogenesis, and cold acclimation (uniprot.org). Together, these genes play a  
645 role in both obesity and dietary regulation. Both *APPL* genes are associated with obesity and  
646 non-alcoholic fatty liver disease and their sweep signature in *P. crinitus* has relevant  
647 connections to biomedical research that remain to be explored (Jiang et al. 2012; Barbieri et al.  
648 2013). Physiological tests will be essential to determine whether desert-adapted deer mice  
649 prioritize proteins or fats during periods of resource limitation (e.g., lipids-for-torpor) or extreme  
650 dehydration (e.g., protein-for-water hypothesis).

651 Molecular rewiring of metabolic processes in response to environmental conditions has  
652 been documented in a number of species (e.g., mammals, Velotta et al. 2020; birds, Xie et al.  
653 2018; fruit flies, Mallard et al. 2018), but expression changes can also impact species  
654 metabolism (Cheviron et al. 2012; Storz and Cheviron 2016). The capacity for rapid molecular  
655 adaptation to distinct thermal environments through either transcriptomic regulation or changes  
656 to protein coding genes, combined with thermoregulatory behavioral fine-tuning (e.g.,  
657 nocturnality, aestivation, food caching, burrowing, dietary shifts), suggests there may be many  
658 evolutionary strategies available for small mammals to accommodate increasing temperatures.  
659 Anthropogenic change, however, is occurring at a rate that far outpaces the evolutionary  
660 timescales on which these adaptations have naturally evolves; Thus, while metabolism and  
661 metabolic plasticity represent fundamental phenotypes for anticipating species survival under  
662 altered climate scenarios natural selection, alone they may be insufficient for species survival.

663

#### 664 *Different evolutionary strategies, same result*

665 Diverse functional enrichment of the *P. crinitus* genome (Fig. 4), spanning metabolic and  
666 osmoregulatory functions, in addition to the general functional enrichment of ribosomes,

667 identifies a number of candidate loci worthy of detailed examination. Additional, comparisons  
668 across populations and environments will illustrate the influence of these loci and others in  
669 thermoregulation, dehydration, and other adaptive traits. Significant selective sweeps that are  
670 not shared among desert specialists, including most of the loci detected here, may still be  
671 related to desert adaptation but could also be related to other aspects of this species biology.

672       There are multiple evolutionary routes to achieve environmental adaptation, most  
673 notably through genomic changes in protein coding genes or transcriptional regulation of gene  
674 expression. Lack of evidence for parallel evolution between desert specialists, the proximity of  
675 significant selective sweeps to protein coding genes, diverse functional enrichment of *P. crinitus*  
676 relative to *P. eremicus*, and previous gene expression results for *P. eremicus* (Kordonowy and  
677 MacManes 2017; MacManes 2017) lead us to hypothesize alternative evolutionary strategies for  
678 each desert specialist, each shaped by their independent demographic histories: *P. crinitus*  
679 primarily through changes in protein coding genes and *P. eremicus* primarily through  
680 transcriptional regulation. Evidence of many significant sweep sites in the *P. eremicus* genome,  
681 located more distant from protein coding genes, and with functional enrichment restricted to  
682 ribosomes, suggests that adaptation in this species may be driven more by selection on  
683 regulatory or non-coding regions of the genome that impact gene expression, a hypothesis that  
684 is consistent with transcriptomic investigations in this species (MacManes and Eisen 2014;  
685 Kordonowy and MacManes 2017) and other *Peromyscus* and rodents (Cheviron et al. 2012;  
686 Marra et al. 2014; Storz and Cheviron 2016). Without equivalent gene expression data for *P.*  
687 *crinitus*, we cannot eliminate a similarly important role for transcriptional regulation and look  
688 forward to testing this hypothesis in greater detail with RNAseq data. Transcriptional regulation  
689 is a particularly useful mechanism for environmental acclimation, as these changes are more  
690 transient relative to genomic changes and can enhance phenotypic flexibility (Garrett and  
691 Rosenthal 2012; Rieder et al. 2015; Liscovitch-Brauer et al. 2017). Reduced variation is  
692 expected near selective sweeps and can encompass tens to thousands of adjacent nucleotides

693 depending on recombination and the strength of selection (Fay and Wu 2000; Carlson et al.  
694 2005), yet counter to expectations, Tajima's D and nucleotide diversity for regions flanking  
695 putative selective sweeps were significantly higher than the global average for most  
696 comparisons (Table S20). The same observation, elevated Tajima's D and nucleotide diversity  
697 surrounding selective sweeps, was also made in *P. eremicus* (Tigano et al. 2020). This  
698 counterintuitive pattern holds across different window sizes (1 kbp, 10 kbp) and warrants further  
699 investigation.

700 Placing the results of selective sweep analyses within an evolutionary framework is also  
701 critical to interpreting adaptive evolutionary responses. The deer mouse genus *Peromyscus*  
702 originated approximately 8 Mya, followed by a massive radiation around 5-6 Mya that led to the  
703 divergence of a monophyletic clade now comprised of desert adapted taxa, although the  
704 ancestral state of this clade remains unknown. These desert adapted species may have  
705 colonized arid environments through either a single or multiple invasions, with further  
706 interspecific divergence thereafter (Platt et al. 2015). The expansion of North American deserts  
707 following the conclusion of the last glacial maximum (~11 Kya; Pavlik et al. 2008) constrains the  
708 adaptive timescales of contemporary desert species. The consistently stable and low historical  
709 effective population size of *P. eremicus* suggests that his species has harbored less genetic  
710 variation for selection to act on, despite similar levels of contemporary diversity relative to *P.*  
711 *crinitus* (Fig. 2). In consequence, adaptive evolution of *P. eremicus* is likely to have been more  
712 impacted by genetic drift (Allendorf 1986; Masel 2011) relative to *P. crinitus*, which historically  
713 has a larger effective population size and therefore a broader pool of variation for selection to  
714 act upon across evolutionary timescales, which could explain the higher diversity of genes and  
715 enriched GO terms compared to *P. eremicus*. Within this context, changes in regulatory  
716 elements that mediate gene expression may have been a more efficient means of  
717 environmental adaptation available to *P. eremicus* (Allendorf 1986; Neme and Tautz 2016;  
718 Mallard et al. 2018), whereas the larger historical effective population size of *P. crinitus* is more

719 conducive to the maintenance of higher levels of genetic diversity and may have enabled the  
720 rapid evolution of protein coding sequences through mutational stochasticity, the reduced  
721 impact of genetic drift, a larger pool of standing genetic variation, and potentially, gene flow.  
722 *Peromyscus crinitus* experienced a historical demographic bottleneck prior to the formation of  
723 North American deserts; Nevertheless, the recovered effective population size of *P. crinitus* is  
724 much larger than *P. eremicus* and consistent with low levels of detected admixture in *P. crinitus*  
725 (Fig. S7, Table S8). Negative Tajima's D values can indicate population expansion following a  
726 bottleneck, consistent with both the demographic history of *P. crinitus* and putative admixture in  
727 this species. Evidence of a historical bottleneck is also reinforced by moderate to high levels of  
728 nucleotide diversity in *P. crinitus*. Repeated growth and contraction of rivers in the American  
729 Southwest during Pleistocene glacial-interglacial cycles (0.7-0.01 Mya; Muhs et al. 2003; Van  
730 Dam and Matzke 2016) would have provided iterative opportunities for connectivity and  
731 introgression between incompletely-isolated *Peromyscus* species. Historical hybridization  
732 between *P. crinitus* and one or more other Peromyscine species, likely unsampled here, may  
733 have accelerated adaptation in *P. crinitus* through the rapid influx of novel mutation  
734 combinations through adaptive introgression, a hypothesis that warrants further investigation  
735 through expanded taxonomic sampling and explicit tests of adaptive introgression. Low-  
736 coverage whole-genome resequencing is optimal for population genomics investigations  
737 (O'Rawe et al. 2015; da Fonseca et al. 2016), but limits detailed analyses of historical  
738 introgression. We look forward to testing this hypothesis with expanded population sampling  
739 and increased sequencing depth. Finally, linkage disequilibrium decay is also weaker in larger  
740 populations, where recombination is higher, therefore it's possible that the shorter distance  
741 between significant sweep sites and the nearest coding gene in *P. crinitus* could be due to the  
742 larger historical population sizes of this species relative to *P. eremicus*. However, the  
743 evolutionary scales of *PSMC* and *Sweepfinder2* do not overlap, *PSMC* characterizes historical  
744 demography beyond 10 kya, whereas selective sweeps have occurred recently. Overall,

745 incorporating an evolutionary perspective into the interpretation of selection patterns has  
746 important implications for understanding species responses to changing climate, as historical  
747 demography and gene flow, in addition to selection, shape genetic diversity over evolutionary  
748 timescales.

749

## 750 *Conclusion*

751 Contrasting patterns of selective sweeps and evolutionary histories between different species  
752 experiencing similar environmental pressures can provide powerful insights into the adaptive  
753 potential of species. We used comparative and population genomic analyses of three  
754 *Peromyscus* species to identify candidate loci that may underlie adaptations to desert  
755 environments. Candidate loci identified in *P. crinitus* serve to inform future investigations  
756 focused on predicting potential for adaptation and identifying the causes of warming-related  
757 population declines (Cahill et al. 2013). The identification of numerous targets of selection within  
758 *P. crinitus* highlights multiple molecular mechanisms (metabolic switching, osmoregulatory  
759 tuning) associated with physiological responses to deserts that warrant further investigation..  
760 Our approach demonstrates the importance of placing genomic selection analyses into an  
761 evolutionary framework to anticipate evolutionary responses to change.

762

## 763 **ACKNOWLEDGEMENTS**

764 We thank A. S. Westbrook for computational support; the Premise computing cluster at the  
765 University of New Hampshire, where all analyses were conducted; the Biotechnology Resource  
766 Center at Cornell University for preparation of whole-genome resequencing libraries;  
767 Christopher Tracy for access to the Boyd Deep Canyon Reserve; Jim Patton for desert field  
768 expertise; Sen Pathak, Asha Multani, Richard Behringer for providing the fibroblast samples  
769 from the T.C. Hsu Cryo-Zoo at the University of Texas M.D. Anderson Cancer Center; DNA Zoo  
770 for generating Hi-C data; Pawsey Supercomputing Centre with funding from the Australian

771 Government and the Government of Western Australia for computational support of the DNA  
772 Zoo effort and the Museum of Southwestern Biology at the University of New Mexico for loaned  
773 tissue materials; two anonymous reviewers whose comments significantly improved the  
774 manuscript. This work was funded by the National Institute of Health National Institute of  
775 General Medical Sciences to MDM (1R35GM128843).

776

777

#### **DATA AVAILABILITY STATEMENT**

778 The draft assembly data are housed on the European Nucleotide Archive (ENA) under project  
779 ID PRJEB33592. The Hi-C data is available on SRA ([SRX7041777](#), [SRX7041776](#),  
780 [SRX7041773](#)) under the DNA Zoo project accession [PRJNA512907](#). The *P. crinitus* genome  
781 assembly is available at [https://www.dnazoo.org/assemblies/Peromyscus\\_crinitus](https://www.dnazoo.org/assemblies/Peromyscus_crinitus). Whole-  
782 genome resequencing data for *P. crinitus* are available on ENA under project ID PRJEB35488.  
783 Custom python scripts and other bash scripts used in analysis are available at:  
784 [https://github.com/jpcolella/Peromyscus\\_crinitus](https://github.com/jpcolella/Peromyscus_crinitus).

785



786 **REFERENCES**

- 787 Abbott, K. (1971). Water economy of the canyon mouse, *Peromyscus crinitus stephensi*.  
788 *Comparative Biochemistry and Physiology*, 38A: 37–52.
- 789 Allendorf, F. (1986). Genetic drift and the loss of alleles versus heterozygosity. *Zoo Biology*, 5:  
790 181–190.
- 791 Anderson, K., & Jetz, W. (2005). The broad-scale ecology of energy expenditure of  
792 endotherms. *Ecology Letters*, 8: 310–318.
- 793 Baker, B., Nargund, A., Sun, T., & Haynes, C. (2012). Protective coupling of mitochondrial  
794 function and protein synthesis via the eIF2 $\alpha$  kinase GCN-2. *PLoS Genetics*, 8: e1002760.
- 795 Bar, N., & Volkoff, H. (2012). Adaptation of the physiological, endocrine and digestive system  
796 functions to prolonged food deprivation in fish. In *Comparative physiology of fasting,*  
797 *starvation, and food limitation* (pp. 69–90). New York: Springer.
- 798 Bar-Yaacov, D., Blumberg, A., & Mishmar, D. (2012). Mitochondrial-nuclear co-evolution and its  
799 effects on OXPHOS activity and regulation. *Biochimica et Biophysica Acta (BBA)-Gene*  
800 *Regulatory Mechanisms*, 1819: 1107–1111.
- 801 Barbieri, M., Esposito, A., Angellotti, E., Rizzo, M., Marfella, R., & Paolisso, G. (2013).  
802 Association of genetic variation in adaptor protein APPL1/APPL2 loci with non-alcoholic fatty  
803 liver disease. *PLOS ONE*, 8: e71391.
- 804 Barreto, F., & Burton, R. (2013). Evidence for compensatory evolution of ribosomal proteins in  
805 response to rapid divergence of mitochondrial rRNA. *Molecular Biology and Evolution*, 30:  
806 310–314.
- 807 Bassham, S., Catchen, J., Lescak, E., von Hippel, F., & Cresko, W. (2018). Repeated selection  
808 of alternatively adapted haplotypes creates sweeping genomic remodeling in stickleback.  
809 *Genetics*, 209: 921–939.
- 810 Bedford, M., & Hoekstra, H. (2015). The natural history of model organisms: *Peromyscus* mice  
811 as a model for studying natural variation. *Elife*, 4: e06813.

- 812 Bi, K., Linderoth, T., Singhal, S., Vanderpool, D., Patton, J., Nielsen, R., ... Good, J. (2015).  
813 Temporal genomic contrasts reveal rapid evolutionary responses in an alpine mammal during  
814 recent climate change. *PLoS Genetics*, 15: e1008119.
- 815 Booker, T., Jackson, B., & Keightley, P. (2017). Detecting positive selection in the genome.  
816 *BMC Biology*, 15. doi: <https://doi.org/10.1186/s12915-017-0434-y>
- 817 Bradley, R., Durish, N., Rogers, D., Miller, J., Engstrom, M., & Kilpatrick, C. (2007). Toward a  
818 molecular phylogeny for *Peromyscus*: Evidence from mitochondrial cytochrome-b  
819 sequences. *Journal of Mammalogy*, 88: 1146–1159.
- 820 Buck, M., Squire, T., & Andrews, M. (2002). Coordinate expression of PDK4 gene: a means of  
821 regulating fuel selection in a hibernating mammal. *Physiological Genomics*, 8: 5–13.
- 822 Bult, C. J., Blake, J. A., Smith, C. L., Kadin, J. A., Richardson, J. E., and the Mouse Genome  
823 Database Group. (2019). Mouse Genome Database (MGD). *Nucleic Acids Research*, 8:  
824 D801-D806.
- 825 Burg, M., Ferraris, J., & Dmitrieva, N. (2007). Cellular response to hyperosmotic stresses.  
826 *Physiological Reviews*, 87: 1441–1474.
- 827 Cahill, A., Aiello-Lammens, M., Fisher-Reid, M., Hua, X., Karanewsky, C., Yeong Ryu, H., ...  
828 Wiens, J. (2013). How does climate change cause extinction? *Proceedings of the Royal  
829 Society B: Biological Sciences*, 280: 20121890.
- 830 Campbell, M., Holt, C., Moore, B., & Yandell, M. (2014). Genome annotation and curation using  
831 MAKER and MAKER-P. *Current Protocols in Bioinformatics*, 48: 4–11.
- 832 Carlson, C., Thomas, D., Eberle, M., Swanson, J., Livingston, R., Rieder, M., & Nickerson, D.  
833 (2005). Genomic regions exhibiting positive selection identified from dense genotype data.  
834 *Genome Research*, 15: 1553–1565.
- 835 Charlesworth, B. (2009). Effective population size and patterns of molecular evolution and  
836 variation. *Nature Reviews Genetics*, 10: 195–205.

- 837 Chen, H., & Boutros, P. (2011). VennDiagram: a package for the generation of highly-  
838 customizable Venn and Euler diagrams in R. *BMC Bioinformatics*, 12: 35
- 839 Chen, I., Hill, J., Ohlemueller, R., Roy, D., & Thomas, C. (2011). Rapid range shifts of species  
840 associated with high levels of climate warming. *Science*, 333: 1024–1026.
- 841 Chen, S., Zhou, Y., Chen, Y., & Gu, H. (2018). fastp: an ultra-fast all-in-one FASTQ  
842 preprocessor. *Bioinformatics*, 34: i884–i890.
- 843 Cheviron, Z., Bachman, G., Connaty, A., McClelland, G., & Storz, J. (2012). Regulatory  
844 changes contribute to the adaptive enhancement of thermogenic capacity in high-altitude  
845 deer mice. *Proceedings of the National Academy of Sciences*, 109: 8635–8640.
- 846 Cheviron, Z., Connaty, A., McClelland, G., & Storz, J. (2014). Functional genomics of  
847 adaptation to hypoxic cold-stress in high-altitude deer mice: transcriptomic plasticity and  
848 thermogenic performance. *Evolution*, 68: 48–62.
- 849 Cook, R., & Weisberg, S. (1984). Residuals and influence in Regression. Wiley.
- 850 Coyne, J. A., & Orr, H. A. (2004). Speciation. Sunderland, MA: Sinauer Associates.
- 851 da Fonseca, R. R., Albrechtsen, A., Themudo, G., Ramos-Madrugal, J., Sibbesen, J., Maretty,  
852 L., ... Pereira, R. (2016). Next-generation biology: sequencing and data analysis approaches  
853 for non-model organisms. *Marine Genomics*, 30: 3–13. doi: 10.1016/j.margen.2016.04.012
- 854 Danecek, P., Auton, A., Abecasis, G., Albers, C. A., Banks, E., DePristo, M. A., ... 1000  
855 Genome Project Data Process Subgroup. (2011). The variant call format and VCFtools.  
856 *Bioinformatics*, 27: 2156–2158.
- 857 Degen, A. (2012). Ecophysiology of small desert mammals. Springer Science & Business  
858 Media.
- 859 DeGiorgio, M., Huber, C., Hubisz, M., Hellmann, I., & Nielsen, R. (2016). SweepFinder2:  
860 increased sensitivity, robustness and flexibility. *Bioinformatics*, 32: 1895–1897.
- 861 Dewey, M., & Dawson, W. (2001). Deer mice: "the *Drosophila* of North American mammalogy.  
862 *Genesis*, 29: 105–109.

- 863 Dudchenko, O., Batra, S., Omer, A., Nyquist, S., Hoeger, M., Durand, N., ... Aiden, E. (2017).  
864 De novo assembly of the *Aedes aegypti* genome using Hi-C yields chromosome-length  
865 scaffolds. *Science*, 356: 92–95.
- 866 Dudchenko, O., Shamim, M., Batra, S., Durand, N., Musial, N., Mostofa, R., ... Aiden, E. (2018).  
867 The Juicebox Assembly Tools module facilitates de novo assembly of mammalian genomes  
868 with chromosome-length scaffolds for under \$1000. *BioRxiv*. doi:  
869 <https://doi.org/10.1101/254797>
- 870 Durand, N., Shamim, M., Machol, I., Rao, S., Huntley, M., Lander, E., & Aiden, E. (2016). Juicer  
871 provides a one-click system for analyzing loop-resolution Hi-C experiments. *Cell*  
872 *Systematics*, 3: 95–98.
- 873 Emms, D. M., & Kelly, S. (2015). OrthoFinder: solving fundamental biases in whole genome  
874 comparisons dramatically improves orthogroup inference accuracy. *Genome Biology*, 16:  
875 157.
- 876 Faust, G., & Hall, I. (2014). SAMBLASTER: fast duplicate marking and structural variant read  
877 extraction. *Bioinformatics*, 30: 2503–2505.
- 878 Fay, J., & Wu, C.-I. (2000). Hitchhiking under positive Darwinian selection. *Genetics*, 155:  
879 1405–1413.
- 880 Freeman, B., Lee-Yaw, J., Sunday, J., & Hargreaves, A. (2018). Expanding, shifting and  
881 shrinking: The impact of global warming on species' elevational distributions. *Global Ecology*  
882 *and Biogeography*, 27: 1268–1276.
- 883 Fumagalli, M., Vieira, F., Linderoth, T., & Nielsen, R. (2014). ngsTools: methods for population  
884 genetics analyses from next-generation sequencing data. *Bioinformatics*, 30: 1486–1487.
- 885 Garcia-Elfring, A., Barrett, R., & Millien, V. (2019). Genomic signatures of selection along a  
886 climatic gradient in the northern range margin of the white-footed mouse (*Peromyscus*  
887 *leucopus*). *Journal of Heredity*, 110: 684–695.

- 888 Garrett, S., & Rosenthal, J. (2012). RNA editing underlies temperature adaptation in K<sup>+</sup>  
889 channels from polar octopuses. *Science*, 335: 848–851.
- 890 Gerson, A., & Guglielmo, C. (2011a). Flight at low ambient humidity increases protein  
891 catabolism in migratory birds. *Science*, 333: 1434–1436.
- 892 Gerson, A., & Guglielmo, C. (2011b). House sparrows (*Passer domesticus*) increase protein  
893 catabolism in response to water restriction. *American Journal of Physiology*, 300: R925–  
894 R930.
- 895 Glazier, D. (1980). Ecological shifts and the evolution of geographically restricted species of  
896 North American *Peromyscus* (mice). *Journal of Biogeography*, 7: 63–83.
- 897 Han, M., Thomas, G., Lugo-Martinez, J., & Hahn, M. (2013). Estimating gene gain and loss  
898 rates in the presence of error in genome assembly and annotation using CAFE 3. *Molecular*  
899 *Biology and Evolution*, 30: 1987–1997.
- 900 Harding, H., Zhang, Y., Zeng, H., Novoa, I., Lu, P., Calfon, M., ... Ron, D. (2003). An integrated  
901 stress response regulates amino acid metabolism and resistance to oxidative stress.  
902 *Molecular Cell*, 11: 619–633.
- 903 Hoffmann, A., & Sgrò, C. (2011). Climate change and evolutionary adaptation. *Nature*, 470:  
904 479–485.
- 905 Hoffmann, A., & Willi, Y. (2008). Detecting genetic responses to environmental change. *Nature*  
906 *Reviews: Genetics*, 9: 421–432.
- 907 Hu, C., & Hoekstra, H. (2017). *Peromyscus* burrowing: A model system for behavioral evolution.  
908 *Seminars in Cell and Developmental Biology*, 61: 107–114.
- 909 Huber, C., DeGiorgio, M., Hellmann, I., & Nielsen, R. (2016). Detecting recent selective sweeps  
910 while controlling for mutation rate and background selection. *Molecular Ecology*, 25: 142–  
911 156.
- 912 Issaian, T., Urity, V., Dantzler, W., & Pannabecker, T. (2012). Architecture of vasa recta in the  
913 renal inner medulla of the desert rodent *Dipodomys merriami*: potential impact on the urine

- 914 concentrating mechanism. *American Journal of Physiology - Regulatory, Integrative and*  
915 *Comparative Physiology*, 303: R748–R756.
- 916 Ivy, C., & Scott, G. (2017). Control of breathing and ventilatory acclimatization to hypoxia in  
917 deer mice native to high altitudes. *Acta Physiologica*, 221: 266–282.
- 918 Jain, C., Koren, S., Dilthey, A., Phillippy, A. M., Aluru, S. (2018) A fast adaptive algorithm for  
919 computing whole-genome homology maps. *Bioinformatics*, 34: i748-i756.
- 920 Jain, C., Dilthey A, Koren, S, Aluru, S., Phillippy, A. M. (2017) A fast approximate algorithm for  
921 mapping long reads to large reference databases. In: Sahinalp S. (eds) *Research in*  
922 *Computational Molecular Biology*. RECOMB 2017. Lecture Notes in Computer Science,  
923 10229. Springer, Cham.
- 924 Jenni, L., & Jenni-Eiermann, S. (1998). Fuel supply and metabolic constraints in migrating birds.  
925 *Journal of Avian Biology*, 29: 521–528.
- 926 Jiang, H., Lei, R., Ding., S.-W., Zhu, S. (2014). Skewer: a fast and accurate adapter trimmer for  
927 next-generation sequencing paired-end reads. *BMC Bioinformatics*, 15: 182.
- 928 Jiang, S., Fang, Q., Yu, W., Zhang, R., Hu, C., Dong, K., ... Jia, W. (2012). Genetic variations in  
929 APPL2 are associated with overweight and obesity in a Chinese population with normal  
930 glucose tolerance. *BMC Medical Genetics*, 13: 22.
- 931 Johnson, D., & Armstrong, D. (1987). *Peromyscus crinitus*. *Mammalian Species*, 287: 1–8.
- 932 Jones, M., Mills, L., Alves, P., Callahan, C., Alves, J., Lafferty, D., ... Good, J. (2018). Adaptive  
933 introgression underlies polymorphic seasonal camouflage in snowshoe hares. *Science*, 360:  
934 1355–1358.
- 935 Kaseloo, P., Crowell, M., & Heideman, P. (2014). Heritable variation in reaction norms of  
936 metabolism and activity across temperatures in a wild-derived population of white-footed  
937 mice (*Peromyscus leucopus*). *Journal of Comparative Physiology B*, 184(4): 525–534.
- 938 Kim, Y., & Stephan, W. (2002). Detecting a local signature of genetic hitchhiking along a  
939 recombining chromosome. *Genetics*, 160: 765–777.

- 940 Kordonowy, L., & MacManes, M. (2017). Characterizing the reproductive transcriptomic  
941 correlates of acute dehydration in males in the desert-adapted rodent, *Peromyscus eremicus*.  
942 *BMC Genomics*, 18: 473.
- 943 Kordonowy, L., Lombardo, K., Green, H., Dawson, M., Bolton, E., LaCourse, S., & MacManes,  
944 M. (2016). Physiological and biochemical changes associated with acute experimental  
945 dehydration in the desert adapted mouse, *Peromyscus eremicus*. *Physiological Reports*, 5:  
946 e13218.
- 947 Korneliussen, T., Albrechtsen, A., & Nielsen, R. (2014). ANGSD: Analysis of Next Generation  
948 Sequencing Data. *Bioinformatics*, 15: 356.
- 949 Kumar, S., & Subramanian, S. (2002). Mutation rates in mammalian genomes. Proceedings of  
950 the National Academy of Sciences, 99: 803–808.
- 951 Lamitina, T., Haung, C., & Strange, K. (2006). Genome-wide RNAi screening identifies protein  
952 damage as a regulator of osmoprotective gene expression. *Proceedings of the National*  
953 *Academy of Sciences of the United States of America*, 103: 12173–12178.
- 954 Levesque, D., Nowack, J., & Stawski, C. (2016). Modelling mammalian energetics: the  
955 heterothermy problem. *Climate Change Responses*, 3: 7.
- 956 Li, H., & Durbin, R. (2010). Fast and accurate long-read alignment with Burrows-Wheeler  
957 transform. *Bioinformatics*, 26: 589–595.
- 958 Li, Heng, & Durbin, R. (2011). Inference of human population history from whole genome  
959 sequence of a single individual. *Nature*, 475: 493–496.
- 960 Li, H., Handsaker, B., Wysoker, A., Fennel, T., Ruan, J., Homer, N., ... 1000 Genome Project  
961 Data Process Subgroup. (2009). The sequence alignment/map format and SAMtools.  
962 *Bioinformatics*, 25: 2078–2079.
- 963 Lindsey, L. (2020). Utilizing genomic applications to examine patterns of diversification in  
964 deer mice (Rodentia: Cricetidae: *Peromyscus*). Texas Tech Dissertation.



- 965 Liscovitch-Brauer, N., Alon, S., Porath, H., Elstein, B., Unger, R., Ziv, T., ... Eisenberg, E.  
966 (2017). Trade-off between transcriptome plasticity and genome evolution in Cephalopods.  
967 *Cell*, 169: 191–202.
- 968 MacManes, M., & Eisen, M. (2014). Characterization of the transcriptome, nucleotide sequence  
969 polymorphism, and natural selection in the desert adapted mouse *Peromyscus eremicus*.  
970 *PeerJ*, 2: e642.
- 971 MacManes, M. (2017). Severe acute dehydration in a desert rodent elicits a transcriptional  
972 response that effectively prevents kidney injury. *American Journal of Physiology. Renal*  
973 *Physiology*, 313: F262–F272.
- 974 MacMillen, R., & Christopher, E. (1975). The water relations of two populations of non-captive  
975 desert rodents. In *Environmental physiology of desert organisms* ((N. F. Hadley, ed.): pp.  
976 117–137). Stroudsburg, Pennsylvania: Dowden, Hutchinson, and Ross.
- 977 MacMillen, R. (1972). Water economy of nocturnal desert rodents. *Symposia of the Zoological*  
978 *Society of London*, 31: 147–174.
- 979 MacMillen, R. (1983). Water regulation in *Peromyscus*. *Journal of Mammalogy*, 64: 38–47.
- 980 Mallard, F., Nolte, V., Tobler, R., Kapun, M., & Schlötterer, C. (2018). A simple genetic basis of  
981 adaptation to a novel thermal environment results in complex metabolic rewiring in  
982 *Drosophila*. *Genome Biology*, 19: 1-15. doi: 10.1186/s13059-018-1503-4
- 983 Marra, N., Romero, A., & DeWoody, J. (2014). Natural selection and the genetic basis of  
984 osmoregulation in heteromyid rodents as revealed by RNA-seq. *Molecular Ecology*, 23:  
985 2699–2711.
- 986 Masel, J. (2011). Genetic drift. *Current Biology*, 21: R837–R838.
- 987 McCue, M., Sandoval, J., Beltran, J., & Gerson, A. (2017). Dehydration causes increased  
988 reliance on protein oxidation in mice: a test of the protein-for-water hypothesis in a mammal.  
989 *Physiological and Biochemical Zoology*, 90: 359–369.



- 990 McDonald, M., Gehrig, S., Meintjes, P., Zhang, X.-X., & Rainey, P. (2009). Adaptive divergence  
991 in experimental populations of *Pseudomonas fluorescens*. IV. Genetic constraints guide  
992 evolutionary trajectories in a parallel adaptive radiation. *Genetics*, 183: 1041–1053.
- 993 McKinley, M., Martelli, D., Pennington, G., Trevaks, D., & McAllen, R. (2018). Integrating  
994 competing demands of osmoregulatory and thermoregulatory homeostasis. *Physiology*, 33:  
995 170–181.
- 996 McNab, B. (1963). The influence of fat deposits on the basal rate of metabolism in desert  
997 homoiotherms. *Comparative Biochemistry and Physiology*, 26: 337–343.
- 998 McNab, B., & Morrison, P. (1963). Body temperature and metabolism in subspecies of  
999 *Peromyscus* from arid and mesic environments. *Ecological Monographs*, 33: 63–82.
- 1000 Melvin, R., & Andrews, M. (2009). Torpor induction in mammals: Recent discoveries fueling  
1001 new ideas. *Trends in Endocrinology and Metabolism*, 20: 490–498.
- 1002 Mi, H., Huang, X., Muruganujan, A., Tang, H., Mills, C., Kang, D., & Thomas, P. (2017).  
1003 PANTHER version 11: expanded annotation data from Gene Ontology and Reactome  
1004 pathways, and data analysis tool enhancements. *Nucleic Acids Research*, 45: F183-D189.
- 1005 Millar, J. (1989). Reproduction and development. In *Advances in the Study of Peromyscus*  
1006 (Rodentia) (eds Kirkland GI Jr, Layne JN, pp. 169–232). Lubbock, Texas: University of Texas  
1007 Press.
- 1008 Morhardt, J., & Hudson, J. (1966). Daily torpor induced in white-footed mice (*Peromyscus* spp.)  
1009 by starvation. *Nature*, 212: 1046–1047.
- 1010 Moritz, C., Patton, J., Conroy, C., Parra, J., White, G., & Beissinger, S. (2008). Impact of a  
1011 century of climate change on small-mammal communities in Yosemite National Park, USA.  
1012 *Science*, 322: 261–264.
- 1013 Morjan, C., & Rieseberg, L. (2004). How species evolve collectively: implications of gene flow  
1014 and selection for the spread of advantageous alleles. *Molecular Ecology*, 13: 1341–1356.

- 1015 Mosin, A. (1984). On the energy fuel in voles during their starvation. *Comparative Biochemistry*  
1016 *and Physiology*, 77: 563–565.
- 1017 Muhs, D., Reynolds, R., Been, J., & Skipp, G. (2003). Eolian sand transport pathways in the  
1018 southwestern United States: importance of the Colorado river and local sources. *Quaternary*  
1019 *International*, 104: 3–18.
- 1020 Murray, G. G. R., Soares, A. E. R., Novak, B. J., Schaefer, N. K., Cahill, J. A., Baker, A. J., ...  
1021 Shapiro, B. (2017) Natural selection shaped the rise and fall of passenger pigeon genomic  
1022 diversity. *Science* 17: 951-954.
- 1023 Nadachowska-Brzyska, K., Burri, R., Linnéa, S., Hans, E. (2016). PSMC analysis of effective  
1024 population sizes in molecular ecology and its application to black-and-white *Ficedula*  
1025 flycatchers. *Molecular Ecology* 25: 1058-1072.
- 1026 Narikiyo, T., Kitamura, K., Adachi, M., Miyoshi, T., Iwashita, K., Shiraishi, N., ... Tomita, K.  
1027 (2002). Regulation of prostaticin by aldosterone in the kidney. *The Journal of Clinical*  
1028 *Investigation*, 109: 401–408.
- 1029 Natarajan, C., Hoffmann, F., Lanier, H., Wolf, C., Cheviron, Z., Spangler, M., ... Storz, J. (2015).  
1030 Intraspecific polymorphism, interspecific divergence, and the origins of function-altering  
1031 mutations in deer mouse hemoglobin. *Molecular Biology and Evolution*, 32: 978–997.
- 1032 Neme, R., & Tautz, D. (2016). Fast turnover of genome transcription across evolutionary time  
1033 exposes entire non-coding DNA to de novo gene emergence. *ELife*, 5: e09977.
- 1034 Nielsen, R., Williamson, S., Kim, Y., Hubisz, M., Clark, A., & Bustamante, C. (2005). Genomic  
1035 scans for selective sweeps using SNP data. *Genome Research*, 15: 1566–1575.
- 1036 Noy-Meir, I. (1973). Desert ecosystems: Environment and producers. *Annual Review of Ecology*  
1037 *and Systematics*, 4: 25–51.
- 1038 O’Rawe, J., Ferson, S., & Lyon, G. (2015). Accounting for uncertainty in DNA sequencing data.  
1039 *Trends in Genetics*, 31: 61–66.

- 1040 Osada, N., & Akashi, H. (2012). Mitochondrial-nuclear interactions accelerated compensatory  
1041 evolution: evidence from the primate cytochrome C oxidase complex. *Molecular Biology and*  
1042 *Evolution*, 29: 337.
- 1043 Park, M., Wu, D., Park, T., Choi, C., Li, R.-K., Cheng, K., ... Sweeney, G. (2013). APPL1  
1044 transgenic mice are protected from high-fat diet-induced cardiac dysfunction. *American*  
1045 *Journal of Physiology: Endocrinology and Metabolism*, 305: E795–E804.
- 1046 Pavlik, B. M. (2008). The California deserts: An ecological rediscovery. Berkeley: University of  
1047 California Press.
- 1048 Pergams, O., & Lacy, R. (2008). Rapid morphological and genetic change in Chicago-area  
1049 *Peromyscus*. *Molecular Ecology*, 17: 450–463.
- 1050 Pierce, S., & Vogt, F. (1993). Winter acclimatization in *Peromyscus maniculatus gracilis* *P*  
1051 *leucopus noveboracensis*, and *P. l. leucopus*. *Journal of Mammalogy*, 74: 665–677.
- 1052 Platt, II, R., Amman, B., Keith, M., Thompson, C., & Bradley, R. (2015). What is *Peromyscus*?  
1053 Evidence from nuclear and mitochondrial DNA sequences suggests the need for a new  
1054 classification. *Journal of Mammalogy*, 96: 708–719.
- 1055 Porcelli, D., Butlin, R., Gaston, K., Joly, D., & Snook, R. (2015). The environmental genomics of  
1056 metazoan thermal adaptation. *Heredity*, 114: 502–514.
- 1057 R Core Team. (2017). R: A language and environment for statistical computing. Vienna, Austria:  
1058 R Foundation for Statistical Computing.
- 1059 Riddle, B., Hafner, D., & Alexander, L. (2000). Phylogeography and systematics of the  
1060 *Peromyscus eremicus* species group and the historical biogeography of North American  
1061 warm regional deserts. *Molecular Phylogenetics and Evolution*, 17: 145–160.
- 1062 Rieder, L., Savva, Y., Reyna, M., Chang, Y.-J., Dorsky, J., Rezaei, A., & Reenan, R. (2015).  
1063 Dynamic response of RNA editing to temperature in *Drosophila*. *BMC Biology*, 13: 1.

- 1064 Robinson, J., Turner, D., Durand, N., Thorvaldsdottir, H., Mesirov, J., & Aiden, E. (2018).  
1065 Juicebox.js provides a cloud-based visualization system for Hi-C data. *Cell Systems*, 6: 256–  
1066 258.
- 1067 Rosenblum, E., Parent, C., & Brandt, E. (2014). The molecular basis of phenotypic  
1068 convergence. *Annual Review of Ecology and Systematics*, 45: 203–226.
- 1069 Rundle, H., Nagel, L., Boughman, J., & Schluter, D. (2000). Natural selection and parallel  
1070 speciation in sympatric sticklebacks. *Science*, 287: 306–308.
- 1071 Schwimmer, H., & Haim, A. (2009). Physiological adaptations of small mammals to desert  
1072 ecosystems. *Integrative Zoology*, 4: 357–366.
- 1073 Shen, L. (2016). GeneOverlap: R package for testing and visualizing gene overlaps. New York  
1074 City, New York: Ichan School of Medicine at Mount Sinai.
- 1075 Sikes, R. S., & The Animal Care and Use Committee of the American Society of Mammalogists.  
1076 (2016). 2016 Guidelines of the American Society of Mammalogists for the use of wild  
1077 mammals in research and education. *Journal of Mammalogy*, 97: 663–688.
- 1078 Silanikove, N. (1994). The struggle to maintain hydration and osmoregulation in animals  
1079 experiencing severe dehydration and rapid rehydration: the story of ruminants. *Experimental*  
1080 *Physiology*, 79: 281–300.
- 1081 Simão, F. A., Waterhouse, R. M., Ioannidis, P., Kriventseva, E. V., & Zdobnov, E. M. (2015).  
1082 BUSCO: assessing genome assembly and annotation completeness with single-copy  
1083 orthologs. *Bioinformatics*, 31: 32-10–3212.
- 1084 Simpson, J., Wong, K., Jackman, S., Schein, J., Jones, S., & Birol, I. (2009). ABySS: a parallel  
1085 assembler for short read sequence data. *Genome Research*, 19: 1117–1123.
- 1086 Skotte, L., Korneliussen, T., & Albrechtsen, A. (2013). Estimating individual admixture  
1087 proportions from next generation sequencing data. *Genetics*, 195: 693–702.
- 1088 Smalec, B., Heider, T., Flynn, B., & O'Neill, R. (2019). A centromere satellite concomitant with  
1089 extensive karyotypic diversity across the *Peromyscus* genus defies predictions of molecular

- 1090 drive. *Chromosome Research: An International Journal on the Molecular, Supramolecular*  
1091 *and Evolutionary Aspects of Chromosome Biology*. doi: 10.1007/s10577-019-09605-1
- 1092 Smit, A., Hubley, R., & Green, P. (2013). RepeatMasker Open-4.0. Available at:  
1093 <http://www.repeatmasker.org/>
- 1094 Smith, J., & Haigh, J. (1974). The hitch-hiking effect of a favourable gene. *Genetical Research*,  
1095 23: 23–35.
- 1096 Steppan, S., Adkins, R., & Anderson, J. (2004). Phylogeny and divergence-date estimates of  
1097 rapid radiations in Muroid rodents based on multiple nuclear genes. *Systematic Biology*, 53:  
1098 533–553.
- 1099 Stockham, S., & Scott, M. (2008). *Fundamental of veterinary clinical pathology*. Ames, IA:  
1100 Wiley-Blackwell.
- 1101 Storz, J., & Cheviron, Z. (2016). Functional genomic insights into regulatory mechanisms of  
1102 high-altitude adaptation. *Advances in Experimental Medicine and Biology*, 903: 113–128. doi:  
1103 10.1007/978-1-4988-7678-9\_8.
- 1104 Storz, J., & Kelly, J. (2008). Effects of spatially varying selection on nucleotide diversity and  
1105 linkage disequilibrium: insights from deer mouse globin genes. *Genetics*, 180: 367–379.
- 1106 Storz, J. (2007). Hemoglobin function and physiological adaptation to hypoxia in high-altitude  
1107 mammals. *Journal of Mammalogy*, 88: 24–31.
- 1108 Storz, J., Runck, A., Moriyama, H., Weber, R., & Fago, A. (2010). Genetic differences in  
1109 hemoglobin function between highland and lowland deer mice. *Journal of Experimental*  
1110 *Biology*, 213: 2565–2574.
- 1111 Storz, J., Cheviron, Z., McClelland, G., & Scott, G. (2019). Evolution of physiological  
1112 performance capacities and environmental adaptation: insights from high-elevation deer mice  
1113 (*Peromyscus maniculatus*). *Journal of Mammalogy*, 100: 910–922.
- 1114 Supek, F., Bošnjak, M., Škunca, N., & Šmuc, T. (2011). REVIGO summarizes and visualizes  
1115 long lists of gene ontology terms. *PLoS One*, 6: e21800.

- 1116 Taniuchi, S., Miyake, M., Tsugawa, K., Oyadomari, M., & Oyadomari, S. (2016). Integrated  
1117 stress response of vertebrates is regulated by four eIF2 $\alpha$  kinases. *Scientific Reports*, 6:  
1118 32886.
- 1119 Tigano, A., Colella, J., & MacManes, M. (2020). Comparative and population genomics  
1120 approaches reveal the basis of adaptation to deserts in a small rodent. *Molecular Ecology*,  
1121 29: 1300–1314.
- 1122 Tigano, A. & Friesen, V. L. (2016). Genomics of local adaptation with gene flow. *Molecular*  
1123 *Ecology*, 25: 2144-2164.
- 1124 Tingley, M., & Beissinger, S. (2013). Cryptic loss of montane avian richness and high  
1125 community turnover over 100 years. *Ecology*, 94: 598–609.
- 1126 Urban, M. (2015). Accelerating extinction risk from climate change. *Science*, 348: 571–573.
- 1127 Van Dam, M., & Matzke, N. (2016). Evaluating the influence of connectivity and distance on  
1128 biogeographical patterns in the south-western deserts of North America. *Journal of*  
1129 *Biogeography*, 43: 1514–1532.
- 1130 Veal, R., & Caire, W. (1979). *Peromyscus eremicus*. *Mammalian Species*, 118: 1–6.
- 1131 Velotta, J., Robertson, C., Schweizer, R., McClelland, G., & Cheviron, Z. (2020). Adaptive shifts  
1132 in gene regulation underlie a developmental delay in thermogenesis in high-altitude deer  
1133 mice. *Molecular Biology and Evolution*, msaa086. doi:  
1134 <https://doi.org/10.1093/molbev/msaa086>
- 1135 Wagner, G., & Lynch, V. (2008). The gene regulatory logic of transcription factor evolution.  
1136 *Trends in Ecology & Evolution*, 23: 277–385.
- 1137 Wallbank, R. W., Baxter, S. W., Pardo-Diaz, C., Hanly, J. J., Martin, S. H., Mallet, J.,  
1138 Dasmahapatra, K. K., Salazar, C., Joron, M., Nadeau, N., McMillan, W. O. (2016).  
1139 Evolutionary novelty in a butterfly wing pattern through enhancer shuffling. *PLoS biology*,  
1140 14(1): p.e.1002353.

- 1141 Weigand, H., & Leese, F. (2018). Detecting signatures of positive selection in non-model  
1142 species using genomic data. *Zoological Journal of the Linnean Society*, 184: 528–583.
- 1143 Weisenfeld, N. I., Kumar, V., Shah, P., Church, D. M., & Jaffe, D. B. (2017). Direct  
1144 determination of diploid genome sequences. *Genome Research*, 27: 757–767.
- 1145 Wichman, H., & Lynch, C. (1991). Genetic variation for seasonal adaptation in *Peromyscus*  
1146 *leucopus*: nonreciprocal breakdown in a population cross. *Journal of Heredity*, 82: 197–204.
- 1147 Williams, T., & Kelley, C. (2010). Gnuplot 4.4: an interactive plotting program (Version 4.4).  
1148 Retrieved from <http://gnuplot.sourceforge.net/>
- 1149 Williams, D. (1987). Generalized linear model diagnostics using the deviance and single case  
1150 deletions. *Applied Statistics*, 36: 181–191.
- 1151 Xie, S., Yang, X., Wang, D., Zhu, F., Yang, N., Hou, Z., & Ning, Z. (2018). Thyroid  
1152 transcriptome analysis reveals different adaptive responses to cold environmental conditions  
1153 between two chicken breeds. *PLOS ONE*, 13: 2018.



## TABLE AND FIGURE CAPTIONS

**Figure 1.** Geographic ranges of the three *Peromyscus* species examined in this study with major southwestern North American deserts denoted by diagonal hashing. *P. crinitus* range is in red, *P. eremicus* in blue, and *P. maniculatus* in yellow. Areas of sympatry denoted by color overlap: dark purple = yellow + red + blue and green = yellow + blue. Collection localities are labeled with white dots and include the Motte Rimrock Reserve (MOT), Elliot Chaparral Reserve (ELL), and Philip L. Boyd Deep Canyon Desert Research Center (DRDC).

**Figure 2.** Distributions of effective population size ( $N_e$ ) through time for *P. crinitus* (red), *P. eremicus* (blue), and *P. maniculatus* (yellow) based on a generation time of 6 months (0.5 years) and a general mammalian mutation rate of  $2.2 \times 10^{-9}$  substitutions/site/year. Note that the *P. maniculatus* genome was sequenced from a captive individual and therefore does not reflect natural populations trends of this species. Composite likelihood ratio (CLR) scores for *P. crinitus* based on *Sweepfinder2* results. Values above the horizontal red line surpass the 99.9<sup>th</sup> percentile. The top five or fewer unique genes are labeled for each chromosome.

**Figure 3.** *REVIGO* plots of enriched functional groups for *P. crinitus* (top row) and *P. eremicus* (bottom row) based on functional annotation of the two nearest protein-coding genes to each site (dataset II) identified as the subject of a selective sweep. Darker colors indicate greater significance. MP = metabolic process, MB = membrane-bound.

**Figure 4.** Composite likelihood ratio (CLR) scores for *P. crinitus* based on *Sweepfinder2* results. Values above the horizontal red line surpass the 99.9<sup>th</sup> percentile. The top five or fewer unique genes are labeled for each chromosome.

**Figure 5.** Overlap in proximal gene names (top row) and enriched GO terms (bottom row) for datasets I (left column), II (center), and III (right). \*indicates significant overlap between species

**Table 1.** Assembly stats, genome size, and global Tajima's D and pi (1 kbp windows) for each *Peromyscus* species.

**Table 2.** Significant sweep sites localized within protein-coding genes for each *Peromyscus* species. Species (Spp.), chromosome (Chr.) sweep position (Pos.), gene name, protein, general function (based on UniProt database: uniprot.org), and direction (Dir.) of gene transcription. Abbreviation definitions: thermogen./thermogenesis, neg./negative, pos./positive, reg./regulation, IGF/insulin-like growth factor, ISR/Integrated Stress Response. \*no gene name alternative available.

**Table 3.** Functional annotation of proximal gene names and enriched GO (gene ontology) terms associated with significant selective sweeps and shared between desert-adapted *P. crinitus* and *P. eremicus*. \* indicates gene names or GO terms also shared with *P. maniculatus*

## TABLES

**Table 1.** Assembly stats, genome size, and global Tajima's D and pi (1 kbp windows) for each *Peromyscus* species.

| Species               | N  | Scaffold N50 | Contig N50 | Size (Gb) <sup>a</sup> | Size (Gb) <sup>b</sup> | Taj. D | $\pi$ |
|-----------------------|----|--------------|------------|------------------------|------------------------|--------|-------|
| <i>P. crinitus</i>    | 9  | 94,816,992   | 204,461    | 2.27                   | 2.28                   | -0.69  | 0.005 |
| <i>P. eremicus</i>    | 26 | 119,957,392  | 76,024     | 2.45                   | 2.54                   | -1.27  | 0.007 |
| <i>P. maniculatus</i> | 5  | 115,033,041  | 42,400     | 2.33                   | 2.44                   | -1.62  | 0.012 |

<sup>a</sup> abyss-fac estimate

<sup>b</sup> assemblathon estimate

**Table 2.** Significant sweep sites localized within protein-coding genes for each *Peromyscus* species. Species (Spp.), chromosome (Chr.) sweep position (Pos.), gene name, protein, general function (based on UniProt database: uniprot.org), and direction (Dir.) of gene transcription. Abbreviation definitions: thermogen./thermogenesis, neg./negative, pos./positive, reg./regulation, IGF/insulin-like growth factor, ISR/Integrated Stress Response. \*no gene name alternative available.

| Spp.                  | Chr.          | Pos.                                        | Gene                                        | Protein                                                                                                                                                                          | General function                                                                                                                    | Dir.                                     |   |
|-----------------------|---------------|---------------------------------------------|---------------------------------------------|----------------------------------------------------------------------------------------------------------------------------------------------------------------------------------|-------------------------------------------------------------------------------------------------------------------------------------|------------------------------------------|---|
| <i>P. maniculatus</i> | 4             | 145409180                                   | <i>ZNF217</i>                               | Zinc finger protein 217                                                                                                                                                          | DNA-binding transcription factor, transcription regulation, zinc binding                                                            | -                                        |   |
|                       | 20            | 36260251                                    | <i>DHRS7B</i>                               | Dehydrogenase/reductase SDR family member 7B                                                                                                                                     | Oxidoreductase activity                                                                                                             | -                                        |   |
| <i>P. eremicus</i>    | 1             | 42451454                                    | <i>Ush1c</i>                                | Harmonin                                                                                                                                                                         | Mechanotransduction in cochlear hair cells                                                                                          | -                                        |   |
|                       | 8             | 67956                                       | <i>MEIOB</i>                                | Meiosis-specific with OB domain-containing protein                                                                                                                               | Meiosis                                                                                                                             | +                                        |   |
| <i>P. crinitus</i>    | 3             | 52113514                                    | <i>PRSS2</i>                                | Trypsin-2                                                                                                                                                                        | Calcium ion binding                                                                                                                 | +                                        |   |
|                       |               |                                             | <i>KLK13</i>                                | Kallikrein-13                                                                                                                                                                    | Protein processing, proteolysis, reg. of IGF                                                                                        | +                                        |   |
|                       |               |                                             | <i>PRSS8</i>                                | Prostasin                                                                                                                                                                        | Sodium balance                                                                                                                      | +                                        |   |
|                       |               |                                             | <i>KLK4</i>                                 | Kallikrein-4                                                                                                                                                                     | Zinc ion binding, proteolysis                                                                                                       | +                                        |   |
|                       |               |                                             | <i>PRTN3</i>                                | Myeloblastin                                                                                                                                                                     | Degrades collagen (I, III, IV), elastin, fibronectin, laminin, vitronectin; blood coagulation, immune response                      | +                                        |   |
|                       |               |                                             | <i>KLK14</i>                                | Kallikrein-14                                                                                                                                                                    | Varied (epidermis morphogenesis)                                                                                                    | +                                        |   |
|                       |               |                                             | TRYP_PIG*                                   | Trypsin                                                                                                                                                                          | Calcium ion binding, proteolysis                                                                                                    | +                                        |   |
|                       |               |                                             | <i>KLK6</i>                                 | Kallikrein-6                                                                                                                                                                     | Varied (collagen catabolism, tissue regen)                                                                                          | +                                        |   |
|                       | <i>CELA2A</i> | Chymotrypsin-like elastase family member 2A | Cleavage and elastin hydrolase, proteolysis | +                                                                                                                                                                                |                                                                                                                                     |                                          |   |
|                       | 4             | 57673659                                    | <i>EIF2AK4</i>                              | eIF-2-alpha kinase GCN2                                                                                                                                                          | Metabolic stress sensing protein kinase, role in ISR required for adaptation to amino acid starvation, protein synthesis repression | -                                        |   |
|                       | 6             | 66203934                                    | <i>Nes</i>                                  | Nestin                                                                                                                                                                           | Brain, eye development (neg. reg. catalytic activity)                                                                               | -                                        |   |
|                       | 9             | 22243007                                    | 23303147                                    | <i>DENND64</i>                                                                                                                                                                   | DENND64                                                                                                                             | Endocytic recycling pathway component    | + |
|                       |               |                                             | 23323150                                    | <i>DENND64</i>                                                                                                                                                                   | DENND64                                                                                                                             | Endocytic recycling pathway component    | + |
|                       |               |                                             | 43305800                                    | <i>Nynrin</i>                                                                                                                                                                    | NYNRIN                                                                                                                              | Nucleic acid binding                     | + |
|                       |               |                                             | <i>Parg</i>                                 | Poly(ADP-ribose) glycohydrolase                                                                                                                                                  | Prevent detrimental accumulation of poly(ADP-ribose) upon prolonged replicative stress                                              | -                                        |   |
|                       |               |                                             | <i>Parg</i>                                 | Poly(ADP-ribose) glycohydrolase                                                                                                                                                  | Prevent detrimental accumulation of poly(ADP-ribose) upon prolonged replicative stress                                              | -                                        |   |
|                       |               |                                             | 22283012                                    | <i>NCOA4</i>                                                                                                                                                                     | Nuclear receptor coactivator 4                                                                                                      | Androgen receptor (iron ion homeostasis) | - |
|                       |               |                                             | 22303015                                    | <i>Oxnad1</i>                                                                                                                                                                    | Oxidoreductase NAD-binding domain-containing protein 1                                                                              | Oxidoreductase activity                  | - |
| 18                    | 450151        | <i>APPL2</i>                                | DCC-interacting protein 13-beta             | Varied (cold acclimation, diet induced thermogen., glucose homeostasis, neg. reg. of insulin response/fatty acid oxidation/glucose import, pos. reg. of cold-induced thermogen.) | -                                                                                                                                   |                                          |   |
|                       |               | <i>APPL1</i>                                | DCC-interacting protein 13-alpha            | Varied. (insulin receptor signaling pathway, pos. reg. of glucose)                                                                                                               | -                                                                                                                                   |                                          |   |

|    |          |              |                                  |                                                                                                                                                                                              |   |
|----|----------|--------------|----------------------------------|----------------------------------------------------------------------------------------------------------------------------------------------------------------------------------------------|---|
|    |          | <i>APPL2</i> | DCC-interacting protein 13-beta  | import)<br>Varied (cold acclimation, diet induced thermogen., glucose homeostasis, neg. reg. of insulin response/fatty acid oxidation/ glucose import, pos. reg. of cold-induced thermogen.) | - |
|    | 460153   | <i>APPL1</i> | DCC-interacting protein 13-alpha | Varied (insulin receptor signaling pathway, pos. reg. of glucose import)                                                                                                                     | - |
| 23 | 28065942 | <i>Tctn1</i> | Tectonic-1                       | Neural development                                                                                                                                                                           | + |
|    |          | <i>Tctn1</i> | Tectonic-1                       | Neural development                                                                                                                                                                           | + |

**Table 3.** Functional annotation of proximal gene names and enriched GO (gene ontology) terms associated with significant selective sweeps and shared between desert-adapted *P. crinitus* and *P. eremicus*. \* indicates gene names or GO terms also shared with *P. maniculatus*

| Data set   | Dataset           | Gene Name /<br>GO term | Function                                                                | Protein/Class                                |                                              |
|------------|-------------------|------------------------|-------------------------------------------------------------------------|----------------------------------------------|----------------------------------------------|
| Gene Names | I                 | none                   | -                                                                       | -                                            |                                              |
|            | II                | <i>BTD</i>             | Hydrolase, biotin transport/metabolism                                  | Biotinidase                                  |                                              |
|            |                   | <i>RL36</i>            | Ribosomal protein, translation                                          | 60S ribosomal protein L36                    |                                              |
|            |                   | <i>BTD</i>             | Hydrolase, biotin transport/metabolism                                  | Biotinidase                                  |                                              |
|            |                   | <i>ENV</i>             | Zn binding, virion attachment                                           | Envelope glycoprotein                        |                                              |
|            |                   | <i>H3X</i>             | DNA binding, protein heterodimerization                                 | Putative histone H3.X                        |                                              |
|            |                   | <i>RL15</i>            | RNA binding, ribosome constituent, translation                          | 60S ribosomal protein L15                    |                                              |
|            |                   | <i>RL36</i>            | Ribosomal protein, translation                                          | 60S ribosomal protein L36                    |                                              |
|            |                   | III                    | <i>RPC1</i>                                                             | Zn/Mg binding, immune response               | DNA-directed RNA polymerase III subunit RPC1 |
|            |                   |                        | <i>RS2*</i>                                                             | Ribosomal protein, enzyme binding            | 40S ribosomal protein S2                     |
|            | <i>RS26</i>       |                        | mRNA binding, ribosome, translation                                     | 40S ribosomal protein S26                    |                                              |
|            | <i>TM38B</i>      |                        | Rapid Ca <sup>2+</sup> release, K <sup>+</sup> channel, ossification    | Trimeric intracellular cation channel type B |                                              |
|            |                   | <i>TRY2</i>            | Ca <sup>2+</sup> binding, collagen catabolism, proteolysis, cell growth | Trypsin-2                                    |                                              |
|            | Enriched GO terms | I                      | none                                                                    | -                                            | -                                            |
|            |                   | GO:0005622             | intracellular                                                           | cellular component                           |                                              |
|            |                   | GO:0005840*            | ribosome                                                                | cellular component                           |                                              |
|            |                   | GO:0022626*            | cystolic ribosome                                                       | cellular component                           |                                              |
| II         |                   | GO:0043226             | organelle                                                               | cellular component                           |                                              |
|            |                   | GO:0043229             | intracellular organelle                                                 | cellular component                           |                                              |
|            |                   | GO:0044391*            | ribosomal subunit                                                       | cellular component                           |                                              |
|            |                   | GO:1990904*            | ribonucleoprotein complex                                               | cellular component                           |                                              |
| III        |                   | GO:0003735*            | structural constituent of ribosome                                      | molecular function                           |                                              |
|            |                   | GO:0022626*            | cystolic ribosome                                                       | cellular component                           |                                              |
|            |                   | GO:0022625*            | cystolic large ribosomal subunit                                        | cellular component                           |                                              |
|            |                   | GO:0044391*            | ribosomal subunit                                                       | cellular component                           |                                              |
|            |                   | GO:0005840*            | ribosome                                                                | cellular component                           |                                              |
|            |                   | GO:0015934             | large ribosomal subunit                                                 | cellular component                           |                                              |
|            |                   | GO:1990904*            | ribonucleoprotein complex                                               | cellular component                           |                                              |

## FIGURES

**Figure 1.** Geographic ranges of the three *Peromyscus* species examined in this study with major southwestern North American deserts denoted by diagonal hashing. *P. crinitus* range is in red, *P. eremicus* in blue, and *P. maniculatus* in yellow. Areas of sympatry denoted by color overlap: dark purple = yellow + red + blue and green = yellow + blue. MOT = Motte Rimrock Reserve, ELL = Elliot Chaparral reserve, DRDC = Philip Boyd Deep Canyon Desert Research Center.

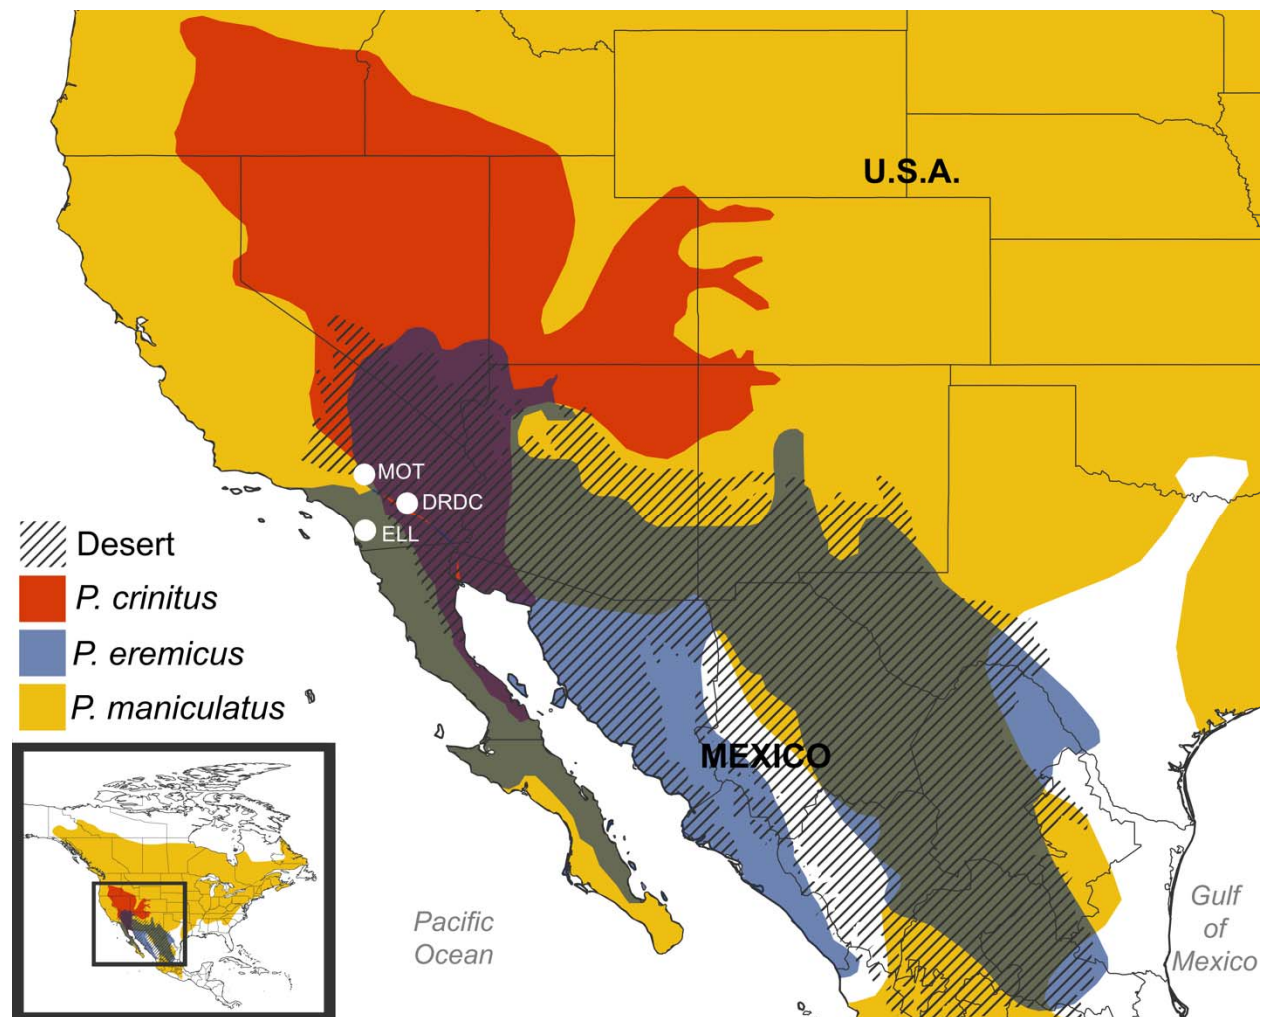



**Figure 2.** Distributions of effective population size ( $N_e$ ) through time for *P. crinitus* (red), *P. eremicus* (blue), and *P. maniculatus* (yellow) based on a generation time of 6 months (0.5 years) and a general mammalian mutation rate of  $2.2 \times 10^{-9}$  substitutions/site/year. Note that the *P. maniculatus* genome was sequenced from a captive individual and therefore does not reflect natural populations trends of this species.

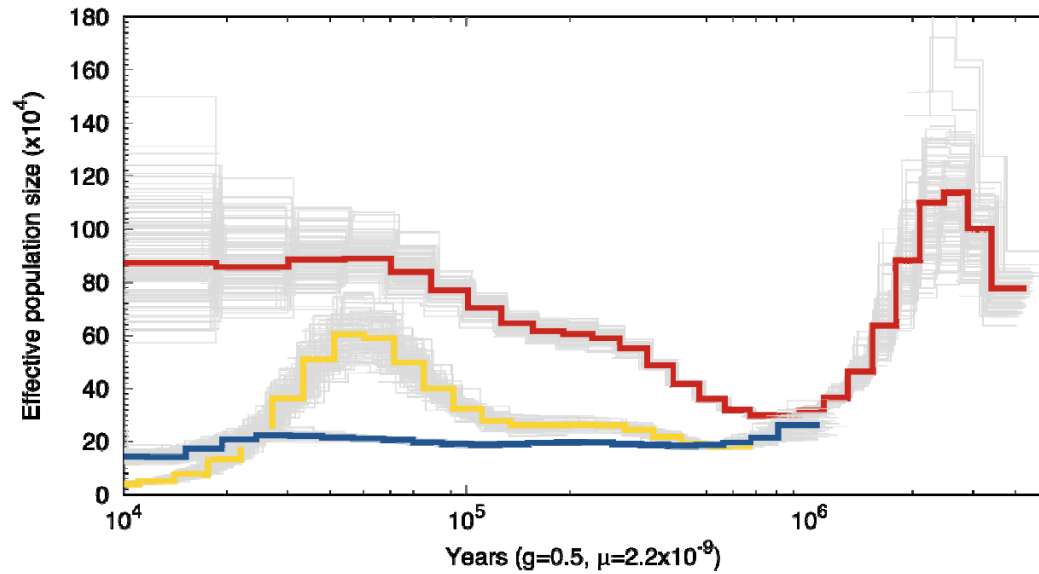

**Figure 3.** REVIGO plots of enriched functional groups for *P. crinitus* (top row) and *P. eremicus* (bottom row) based on functional annotation of the two nearest protein-coding genes to each site (dataset II) identified as the subject of a selective sweep. Darker colors indicate greater significance. MP = metabolic process, MB = membrane-bound.

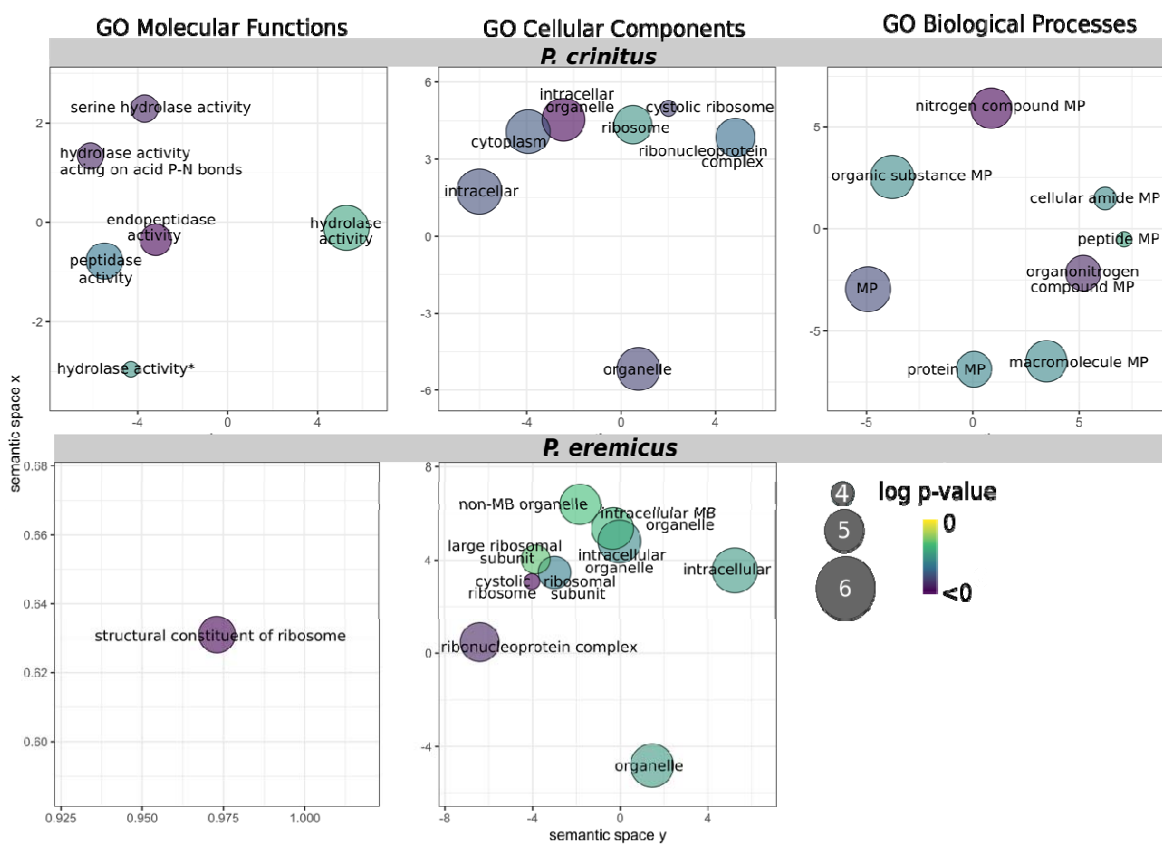

**Figure 4.** Composite likelihood ratio (CLR) scores for *P. crinitus* based on *Sweepfinder2* results. Values above the horizontal red line surpass the 99.9<sup>th</sup> percentile. The top five or fewer unique genes are labeled for each chromosome.

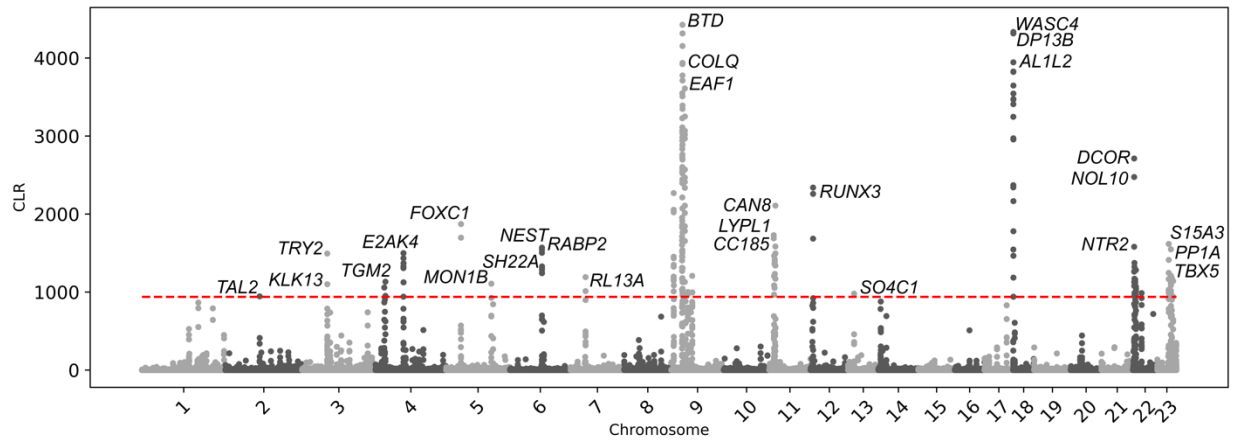

**Figure 5.** Overlap in proximal gene names (top row) and enriched GO terms (bottom row) for datasets I (left column), II (center), and III (right). \*indicates significant overlap between species

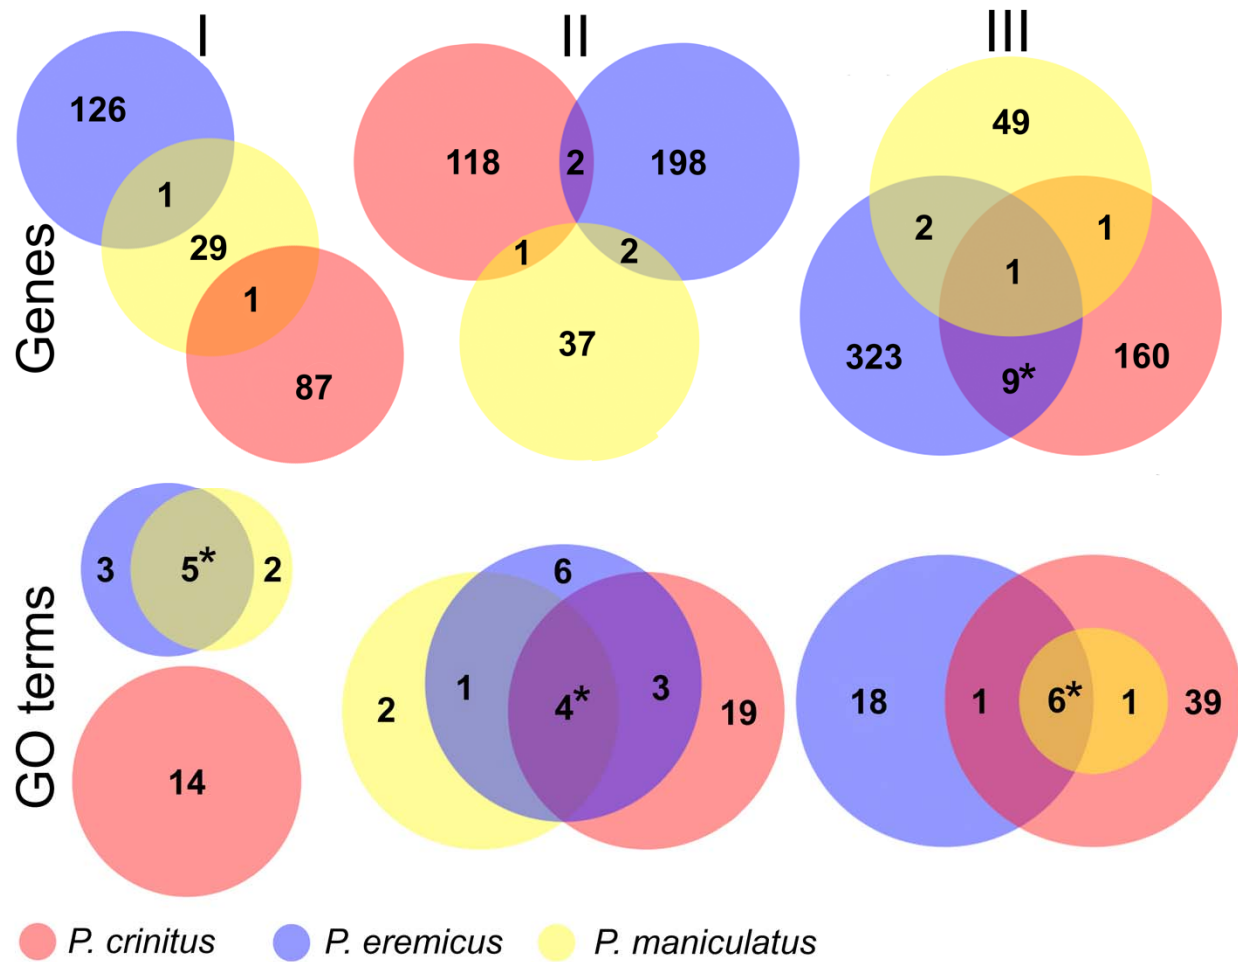

Source: https://www.biorxiv.org/content/biorxiv/early/2021/01/06/2020.06.29.178392.full.pdf
